# 1 *In silico* identification of metabolic enzyme drug 2 targets in *Burkholderia pseudomallei*

3 Jean F. Challacombe <sup>1\*</sup>

4 <sup>1</sup> Bioscience Division, Los Alamos National Laboratory, Los Alamos, NM 87545; jchalla@lanl.gov

5 \* Correspondence: jchalla@lanl.gov; Tel.: +1-505-665-1485

6 **Abstract:** The intracellular pathogen *Burkholderia pseudomallei*, which is endemic to parts of  
7 southeast Asia and northern Australia, causes the disease melioidosis. Although acute infections  
8 can be treated with antibiotics, melioidosis is difficult to cure, and some patients develop chronic  
9 infections or a recrudescence of the disease months or years after treatment of the initial infection.  
10 *B. pseudomallei* strains have a high level of natural resistance to a variety of antibiotics, and with  
11 limited options for new antibiotics on the horizon, new alternatives are needed. The aim of the  
12 present study was to characterize the metabolic capabilities of *B. pseudomallei*, identify metabolites  
13 crucial for pathogen survival, understand the metabolic interactions that occur between pathogen  
14 and host cells, and determine if metabolic enzymes produced by the pathogen might be potential  
15 antibacterial targets. This aim was accomplished through genome scale metabolic modeling under  
16 different external conditions: 1) including all nutrients that could be consumed by the model, and  
17 2) providing only the nutrients available in culture media. Using this approach, candidate  
18 chokepoint enzymes were identified, then knocked out *in silico* under the different nutrient  
19 conditions. The effect of each knockout on the metabolic network was examined. When five of the  
20 candidate chokepoints were knocked out *in silico*, the flux through the *B. pseudomallei* network was  
21 decreased, depending on the nutrient conditions. These results demonstrate the utility of genome-  
22 scale metabolic modeling methods for drug target identification in *B. pseudomallei*.

23

24 **Keywords:** Burkholderia, pathogen, metabolism, metabolic network, nutrients, infection

25

26

---

## 27 1. Introduction

28 The intracellular pathogen *Burkholderia pseudomallei*, which causes the disease melioidosis, is  
29 acquired from the environment in parts of southeast Asia and northern Australia [1,2]. Although  
30 acute infections can be treated with antibiotics, melioidosis is difficult to cure, requiring lengthy  
31 treatment in two phases for a duration of ~20 weeks [3,4]. Despite antibiotic therapy, some patients  
32 have persistent cases that develop into chronic infections, and others experience a recrudescence of  
33 the disease months or years after treatment of the initial infection with antibiotics [5]. *B. pseudomallei*  
34 strains have a high level of natural resistance to a variety of antibiotics [6-8], and with limited options  
35 for new antibiotics on the horizon, alternatives are desperately needed.

36 The availability of many *B. pseudomallei* genomes and advances in computational analysis  
37 methods make possible the rapid identification of novel antibacterial targets by selecting the most  
38 likely targets from complete sets of protein coding genes. Previous studies have demonstrated that  
39 essential genes present in pathogen genomes, but not in the host, make the best therapeutic targets  
40 [9]. Many known antibacterial compounds are enzyme inhibitors [10,11], so metabolic enzymes  
41 specific to pathogenic bacteria represent promising drug targets [9].

42 Enzyme targets in key metabolic pathways have been identified in *B. pseudomallei* and other  
43 bacterial pathogens; these pathways include fatty acid biosynthesis [12-14], the glyoxalate shunt  
44 [15,16], the chorismate pathway for biosynthesis of aromatic amino acids [17], purine, histidine, 4-  
45 aminobenzoate, and lipolate biosynthesis [18,19], leucine, threonine, p-aminobenzoic acid, aromatic

46 compound biosynthesis [20], branched chain amino acid biosynthesis [21], purine metabolism [22].  
47 Other enzyme targets have been identified that are not in pathways - alanine racemase (interconverts  
48 L- and D-alanine) [23], superoxide dismutase [24] and cyclic di-GMP phosphodiesterase [25].

49 Drugs acting on pathogen targets that are not present in the host should not cause significant  
50 side effects. However, before the human genome was available, the process of identifying bacterial  
51 pathogen-specific drug targets was labor intensive, involving comparison of candidate pathogen  
52 targets against all known eukaryotic sequences to filter out targets likely to occur in the human [9].  
53 Since then, various software tools have made the process of *in silico* target identification in pathogen  
54 genomes easier. Available *in silico* tools encompass various cheminformatic [26] and bioinformatic  
55 [27,28] approaches to identify new protein targets. Among the bioinformatic tools, metabolic  
56 pathway/metabolic network analysis has emerged as an efficient *in silico* method to identify  
57 candidate metabolic enzyme targets in pathogen genomes.

58 Several software packages are available to facilitate genome-scale metabolic network analyses  
59 [29]. Starting with an annotated pathogen genome, the components of metabolic pathways are  
60 identified, curated and refined [30]. The resulting genome-scale metabolic model can be used to  
61 integrate omics datasets and to perform various analyses to determine the most likely drug targets  
62 [10]. Perhaps the most important task with respect to finding good candidate targets is metabolic  
63 chokepoint identification. By definition, a chokepoint enzyme either consumes a unique substrate or  
64 produces a unique product in the pathogen metabolic network [31]. Inhibition of chokepoint  
65 enzymes may disrupt crucial metabolic processes in the pathogen, so chokepoints that are essential  
66 to the pathogen represent good potential drug targets [32-34].

67 The aim of the present study was to characterize the metabolic capabilities of *B. pseudomallei*,  
68 identify metabolites and aspects of the metabolic network crucial for pathogen survival, understand  
69 the metabolic interactions that occur between pathogen and host cells, and determine if any of the  
70 metabolic enzymes produced by the pathogen might be potential antibacterial targets. This aim was  
71 accomplished through genome scale metabolic modeling of *B. pseudomallei* under different external  
72 conditions, including all nutrients that could be consumed by the model and only the nutrients  
73 available in culture media. Using this approach, candidate chokepoints were identified, then knocked  
74 out the genes encoding chokepoint enzymes *in silico* under the different nutrient conditions, and  
75 examined the effect of each knockout on the metabolic network. The result of this analysis was five  
76 candidate antibacterial targets, demonstrating the utility of genome-scale metabolic modeling  
77 methods for *in silico* studies of pathogen metabolism and for drug target identification in *B.*  
78 *pseudomallei*.

## 79 **2. Materials and Methods**

### 80 *2.1 Metabolic pathway reconstructions and annotation curation*

81 Pathway genome databases (PGDBs) for *B. pseudomallei* strains MSHR668 and K96243 were  
82 obtained through the Pathway Tools software (version 18.5) from the PGDB registry [35]. We found  
83 that the original annotation of *B. pseudomallei* K96243 identified many fewer coding sequences than  
84 that of MSHR668, so we re-annotated the original complete genome sequences of both strains using  
85 the RAST system [36] to better compare them [37]. The RAST-annotated genome sequences were  
86 loaded into Pathway Tools, using the PathoLogic component to predict the metabolic pathways [38].  
87 For each genome, the set of protein coding sequences from the original annotation was compared to  
88 those from the RAST annotation, using blast to identify coding sequences in common between the  
89 two annotations, and to identify coding sequences that were missing from each annotation. For the  
90 MSHR668 genome, RAST annotation identified 247 fewer coding sequences than the original  
91 annotation. However, there were some predicted coding sequences with annotated functions in the  
92 RAST annotation that were not present in the original, so these were added to the original PGDB for  
93 MSHR668. The RAST annotation of the K96243 genome identified 1,317 more protein coding  
94 sequences than the original annotation, so the PGDB created from the RAST annotation was used as  
95 the starting point. Coding sequences from the original annotation that were not present in the RAST  
96 annotation of K96243 were added to the PGDB that was created from the RAST annotated genome.

97

## 98 2.2 Chokepoint Identification

99 Chokepoints were identified in each PGDB using the chokepoint reaction finder in Pathway  
100 Tools. All reactions were included except those found in human.

101

## 102 2.3 Flux balance analysis

103 For each metabolic network reconstruction, flux balance analysis (FBA) was performed using  
104 the MetaFlux module within the Pathway Tools [39]. Development FBA models were constructed  
105 iteratively to determine the compounds that each model could use and produce. This was  
106 accomplished by trying all compounds in the PGDB as biomass metabolites, nutrients and secretions  
107 in the various compartments (cytosol, periplasmic space and extracellular). Each model was refined  
108 iteratively, first identifying the specific biomass components that could be produced, then trying all  
109 compounds as nutrients and secretions, then specifying the biomass metabolites and nutrients and  
110 trying all compounds as secretions.

111 Once the nutrients, secretions and biomass components that could be consumed or produced by  
112 the metabolic networks were determined, the log file produced by MetaFlux was examined and  
113 problematic reactions were fixed, if possible. Most of the problematic reactions were unbalanced due  
114 to missing chemical formulas of one or more metabolites. A few of these reactions were corrected by  
115 copying the missing structures from other PGDBs. For example, the structures of D-ribose, D-  
116 glucuronate, D-glucose and some other compounds were copied from the more highly curated  
117 *Escherichia coli* K12 substr. MG1655 PGDB. Many of the reactions with compounds that were lacking  
118 chemical formulas were generic so no suitable chemical structure could be found or created.  
119 Reactions involving starch, glycogen, and glucans with variable lengths and non-numeric  
120 stoichiometries, could not be balanced. Other reactions were missing H<sup>+</sup> or H<sub>2</sub>O on one side or the  
121 other, and the addition of the missing compound balanced the reaction. However, there were a small  
122 number of reactions that could not be fixed and these were marked as unbalanced. Once all reactions  
123 that could be fixed were corrected in the PGDB, MetaFlux was run again in development mode to  
124 identify additional biomass metabolites, nutrients, and secretions. Once the set of biomass  
125 metabolites was constant, the nutrients that could be consumed by the model were determined,  
126 followed by identification of the secretions produced by the model. The result of this process was a  
127 final unconstrained FBA model.

128 To mimic the nutrient conditions in culture, only the estimated set of ingredients present in LB  
129 medium were included as nutrients in the FBA model. LB medium includes as its main ingredients  
130 tryptone [40] and yeast extract [41]. Tryptone provides peptides and peptones, which are good  
131 sources of amino acids ([http://www.sigmaldrich.com/analytical-  
132 chromatography/microbiology/basic-ingredients/protein-sources.html](http://www.sigmaldrich.com/analytical-chromatography/microbiology/basic-ingredients/protein-sources.html)); yeast extract provides  
133 vitamins, nitrogenous compounds, carbon, sulfur, trace elements and minerals [42]. The LB media  
134 composition reported in a *Bacillus subtilis* modeling study [43] was used as a starting point for this  
135 study. Starting with the nutrient set that mimicked LB media [43], all compounds were included in  
136 the try-biomass set for the cytosol and periplasmic cellular compartments to see which biomass  
137 metabolites could be produced given only the nutrients present in LB media. Once a stable set of  
138 nutrients was determined, iterations were performed to determine the stable set of biomass  
139 metabolites that could be produced. Then all compounds were tried as secretions in the cytosol and  
140 periplasmic compartments to determine the compounds that could be secreted by the model.

141 A list of nutrients that might be available to *B. pseudomallei* while residing inside host cells during  
142 infection was compiled by searching the literature for infection studies involving *B. pseudomallei* and  
143 host cells. Gene expression studies of other intracellular pathogens and host cells during infection  
144 were also considered. A development FBA model mimicking infection conditions was constructed as  
145 described above for the LB media model.

146

## 147 2.4 Essential gene and candidate drug target identification

148 To reduce the set of potential drug targets, candidate chokepoint enzymes were compared  
149 against the list of essential genes and all of the drug targets in DrugBank. Essential genes in the  
150 MSHR668 genome were determined by blasting all protein coding sequences (amino acid format)  
151 against the Database of Essential Genes [44] using the blastp program with an E-value cut-off of  $1e -$   
152  $10$  and 70% identity as thresholds. Candidate drug target sequences were determined by blasting all  
153 protein coding sequences in the MSHR668 genome (as both nucleotide and amino acid formats)  
154 against the complete set of DrugBank targets [45], using an E-value cutoff of 0.005 and a threshold  
155 identity of 70% to select likely targets.

156

### 157 2.5 *In silico* knockout experiments

158 Knockout experiments were performed *in silico* through the Pathway Tools MetaFlux module  
159 [39]; the chokepoint genes were knocked out one at a time and the effects on total biomass flux  
160 through the metabolic network were noted.

161

### 162 2.6 Network visualization

163 For each PGDB, an .sbml file was exported from the Pathway Tools and loaded into Cytoscape [46]  
164 version 3.1.1 for visualization and comparison of network features.

## 165 3. Results

### 166 3.1. General features of *B. pseudomallei* genomes and metabolic networks

167 The general characteristics of each PGDB and metabolic network for *B. pseudomallei* MSHR668 and  
168 K96243 are listed in Table 1.

169 **Table 1.** Features of *B. pseudomallei* PGDBs and metabolic networks

| <b>Genome<br/>(Pathway Tools PGDB)</b> | <b>Curated MSHR668<br/>(original + RAST)</b> | <b>Curated K96243<br/>(RAST + original)</b> |
|----------------------------------------|----------------------------------------------|---------------------------------------------|
| Coding sequences                       | 7133                                         | 7045                                        |
| Pathways                               | 339                                          | 387                                         |
| Enzymatic reactions                    | 1870                                         | 1995                                        |
| Transport reactions                    | 144                                          | 82                                          |
| Enzymes                                | 1666                                         | 1685                                        |
| Transporters                           | 292                                          | 38                                          |
| Compounds                              | 1397                                         | 1578                                        |
| <b>Metabolic Network</b>               |                                              |                                             |
| Nodes (metabolites)                    | 4295                                         | 4219                                        |
| Edges (reaction steps)                 | 10860                                        | 9747                                        |
| <b>Chokepoints</b>                     |                                              |                                             |
| Producing                              | 444                                          | 506                                         |
| Consuming                              | 419                                          | 498                                         |
| Candidate                              | 479                                          | 348                                         |
| Dead-end reactants                     | 166                                          | 217                                         |
| Dead-end products                      | 72                                           | 118                                         |

170

171 The *B. pseudomallei* MSHR668 and K96243 genomes contained similar numbers of coding  
172 sequences, pathways, enzymatic reactions and enzymes. Differences between the PGDBs were noted  
173 in the numbers of transporters, transport reactions and compounds. The K96243 PGDB contained  
174 fewer transporters and transport reactions and more compounds than MSHR668. In terms of the  
175 metabolic network characteristics, both networks contained similar numbers of nodes (representing  
176 metabolites), while the MSHR668 network had more edges (reaction steps) than K96243. This is likely

177 due to the more extensive curation of the MSHR668 network that was performed during refinement  
178 of the metabolic network models (see Methods).

179 In a metabolic network, chokepoints are reactions that either uniquely produce or uniquely  
180 consume a metabolite. Inhibiting an enzyme that consumes a unique substrate may cause that  
181 metabolite to accumulate, and it may be toxic to the cell; inhibiting an enzyme that produces a unique  
182 product may starve the cell of an essential metabolite [31]. Identifying chokepoint enzymes in  
183 pathogens is a promising *in silico* approach to recognize potential metabolic drug targets. For  
184 example, analysis of *Plasmodium falciparum* metabolism revealed that 87.5% of proposed drug targets  
185 supported by evidence are chokepoint reactions [31]. However, to be a valid chokepoint, the  
186 metabolite in question must be balanced by a producing or consuming reaction and not be a dead-  
187 end metabolite [31]. Table 1 compares the numbers of chokepoint reactions and dead-end metabolites  
188 that were identified in each PGDB. Overall the numbers were similar between the two PGDBs, and  
189 the lower numbers of dead-ends in the MSHR668 database were likely due to the more extensive  
190 curation performed on the MSHR668 PGDB (see Materials and Methods).

### 191 3.2. Flux balance analysis (FBA)

#### 192 3.2.1. Unconstrained FBA model

193 Given a set of nutrients for consumption, along with secretions and metabolites that can be  
194 produced, a FBA model predicts the steady-state flux rates of the metabolic reactions in an organism,  
195 and provides an estimate of the overall biomass flux. FBA was conducted on each metabolic network  
196 as described in the Materials and Methods section. It took several cycles of refinement to solve an  
197 initial unconstrained MSHR668 model. Even after several iterations, the K96243 unconstrained model  
198 did not reach a stable solution, likely because there were missing transporter-encoding genes (and  
199 possibly other genes) in the PGDB, indicating that the annotation needed more curation. Since the  
200 unconstrained MSHR668 model reached a stable solution after performing the initial network  
201 curation steps suggested by MetaFlux, only this model was analyzed further. The initial  
202 unconstrained FBA model of the MSHR668 metabolic network (Table 2) included all possible biomass  
203 compounds that could be produced, all nutrients that could be consumed, and had no weights  
204 imposed on the biomass metabolites and no constraints imposed on the nutrients. [Supplementary  
205 materials, S1\_Final\_unconstrained\_model\_inputs.pdf,  
206 S2\_Final\_unconstrained\_model\_solution.pdf].

#### 207 3.2.2. LB media FBA model

208 To mimic the conditions that *B. pseudomallei* experiences in culture, only the nutrients present in  
209 LB media [43] plus glycerol were included as inputs to the LB media FBA model (Table 2). In this  
210 model, constraints were included on some of the nutrients (ADP, Pi, proton and glycerol).  
211 [Supplementary materials, S3\_Final\_LB\_model\_inputs.pdf and S4\_Final\_LB\_model\_solution.pdf].

212

213

214

215 **Table 2.** Characteristics of the MSHR668 unconstrained and LB media models

| Model         | Total rxns | Rxns carrying flux | Biomass metabolites produced | Nutrients consumed | Secretions | Biomass flux |
|---------------|------------|--------------------|------------------------------|--------------------|------------|--------------|
| Unconstrained | 3193       | 1619               | 1403                         | 667                | 10         | 15000.00     |
| LB media      | 3213       | 1025               | 282                          | 47                 | 0          | 0.079412     |

216

### 217 3.2.3. Host cell infection model

218 In addition to the unconstrained and LB media models, the original plan for this study included  
219 the development of a model of *B. pseudomallei* metabolism that mimics infection conditions.  
220 However, there was very little information available on the growth requirements of *B. pseudomallei*  
221 inside human macrophages. In addition, no comprehensive studies have been performed to identify  
222 the complete list of host cell nutrients that are available to *B. pseudomallei* during infection. Most  
223 studies of the nutritional requirements of intracellular pathogens growing inside host cells have been  
224 performed on *Legionella pneumophila* [47,48], which can grow and replicate similarly in human  
225 macrophages and amoebae [49]. Growing in both human macrophages and amoebae, *L. pneumophila*  
226 utilizes amino acids as its main sources of carbon, nitrogen and energy; *L. pneumophila* obtains amino  
227 acids from the host through proteasomal degradation [48]. However, glucose is also used to feed  
228 central metabolism under both culture and infection conditions [50].

229 Comparing the nutrients provided by the LB media model to the nutrients used by *L.*  
230 *pneumophila* in culture and during infection of amoebae [47], the only difference was the carbohydrate  
231 carbon source: glycerol (*B. pseudomallei* LB media [51]) vs. glucose (*L. pneumophila* AYE media [50]  
232 and in amoebae [47,50]). When glycerol was replaced by glucose in the LB media model of *B.*  
233 *pseudomallei*, no FBA solution was found [data not shown]. Several possible explanations for this  
234 result are presented in the Discussion.

235 While the specific carbon requirements of *B. pseudomallei* in either human macrophages or  
236 amoebae have not been determined, one study produced whole-genome tiling array expression data  
237 to assess *B. pseudomallei* transcriptional responses under 82 different conditions, including infection  
238 [52]. From their supplemental table S2, a list of metabolic genes expressed in the infection conditions  
239 was used to infer the potential nutrients consumed by *B. pseudomallei* during infection. Additional  
240 candidate host cell nutrients were identified from the literature, focusing on studies of intracellular  
241 pathogen-mammalian host infections. The nutrients identified as potential carbon sources for  
242 intracellular survival of various pathogens included aromatic compounds, such as benzoate and  
243 phenylacetic acid and related derivatives [53], sugar acids like gluconate, galactonate, glucuronate,  
244 and galacturonate [54], ribo- and deoxyribonucleosides, hexuronates [55], glutathione [56], glucose  
245 6-phosphate [57,58], glycerol-3-phosphate [59]. The complete list of potential host cell nutrients is in  
246 the [Supplementary material, S5\_Nutrients\_infection\_model.pdf] file.

247 FBA was performed for a *B. pseudomallei* MSHR668 model that included the list of candidate host  
248 cell nutrients identified as above. However, some of the nutrients were not present in any reactions  
249 in the MSHR668 PGDB. When the rest of the compounds were included as nutrients in addition to  
250 glycerol, none of them were consumed by the model, but glycerol was consumed and biomass was  
251 produced. When glycerol was excluded from the nutrient list, none of the other nutrients were  
252 consumed and the model was not solvable [data not shown].

253

254

255

256

### 257 3.3. Metabolic chokepoints and candidate drug targets

258 To narrow down the list of metabolic chokepoints, which represented candidate drug targets,  
259 essential genes and genes with sequence homology to existing DrugBank targets were identified in  
260 the MSHR668 genome. This analysis identified 34 chokepoint genes that were also essential genes  
261 and DrugBank targets (Figure 1, Table 3).

262

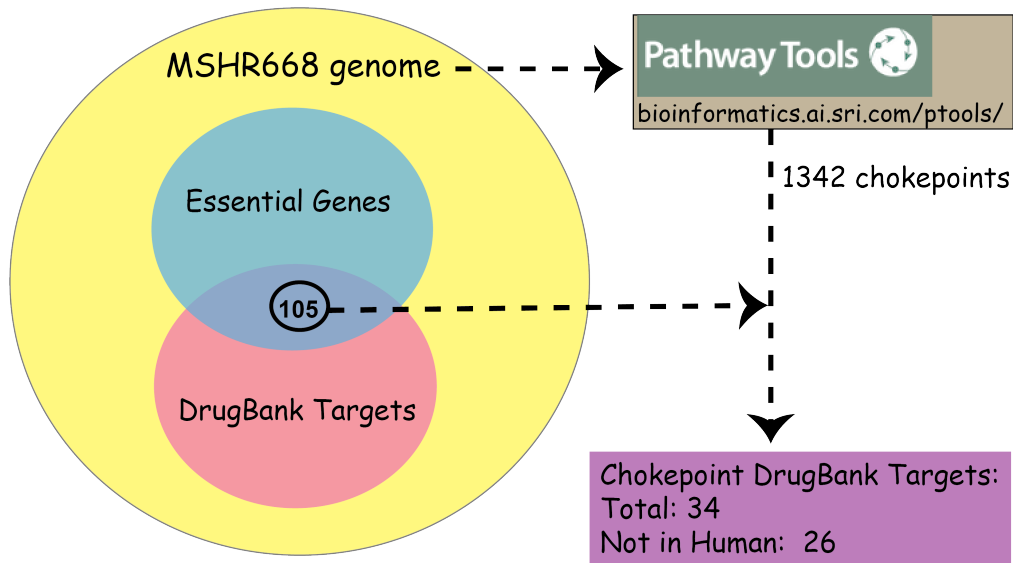

263

264

265

266

**Figure 1.** Process for identifying candidate metabolic enzyme drug targets (chokepoints) in the *B. pseudomallei* MSHR668 genome.

267

268

**Table 3.** Chokepoint genes that encode candidate metabolic enzyme drug targets in *B. pseudomallei* MSHR668

| Locus_tag     | Gene symbol       | Enzyme name                | E.C. number | DrugBank target (drug IDs)                                                                                                                                   | Human target? | Chokepoint in K96243? | Bp Mutant(s) exist? |
|---------------|-------------------|----------------------------|-------------|--------------------------------------------------------------------------------------------------------------------------------------------------------------|---------------|-----------------------|---------------------|
| BURPS668_0305 | argG <sup>+</sup> | argininosuccinate synthase | 6.3.4.5     | P0A6E4<br>Argininosuccinate synthase<br>(DB00536;<br>DB04077)                                                                                                | no            | yes                   | no*                 |
| BURPS668_0328 | folB <sup>+</sup> | dihydroneopterin aldolase  | 4.1.2.25    | P56740<br>Dihydroneopterin aldolase<br>(DB01778;<br>DB01906;<br>DB02119;<br>DB02489;<br>DB03231;<br>DB03571;<br>DB04168;<br>DB04400;<br>DB04425;<br>DB06906) | no            | yes                   | no                  |
| BURPS668_0567 | pth <sup>+</sup>  | peptidyl-tRNA hydrolase    | 3.1.1.29    | No                                                                                                                                                           | yes           | yes                   | no                  |
| BURPS668_0675 | aspS <sup>+</sup> | aspartyl-tRNA synthase     | 6.1.1.12    | P36419<br>Aspartate-tRNA ligase<br>(DB01895)                                                                                                                 | no            | no                    | no                  |

|                   |                   |                                                                |                       |                                                                                                                         |                  |     |     |
|-------------------|-------------------|----------------------------------------------------------------|-----------------------|-------------------------------------------------------------------------------------------------------------------------|------------------|-----|-----|
| BURPS668<br>_0810 | RecA <sup>+</sup> | RecA<br>protein                                                | 5.99.1.-              | P62219 RecA<br>(DB01660;<br>DB03222;<br>DB04444;<br>DB04395)                                                            | no               | yes | no* |
| BURPS668<br>_0964 | dut <sup>+</sup>  | deoxyuridin<br>e5'-<br>triphosphate<br>nucleotidoh<br>ydrolase | 3.6.1.19/<br>3.6.1.23 | P06968<br>Deoxyuridine 5'-<br>triphosphate<br>nucleotidohydro<br>lase (DB01965;<br>DB02333;<br>DB03413;<br>DB03800)     | no               | yes | no  |
| BURPS668<br>_0967 | ileS <sup>+</sup> | isoleucyl-<br>tRNA<br>synthetase                               | 6.1.1.5               | Q9NSE4<br>Isoleucine--<br>tRNA ligase<br>(DB00167)                                                                      | yes              | no  | no  |
| BURPS668<br>_1446 | pckG <sup>+</sup> | phosphoeno<br>lpyruvate<br>carboxykina<br>se                   | 4.1.1.32              | P35558<br>Phosphoenolpyr<br>uvate<br>carboxykinase,<br>cytosolic [GTP]<br>(DB01819;<br>DB02008;<br>DB03267;<br>DB03725) | yes              | yes | no  |
| BURPS668<br>_1465 | dnaQ <sup>+</sup> | DNA<br>polymerase<br>III subunit<br>epsilon                    | 2.7.7.7               | P03007 DNA<br>polymerase III<br>subunit epsilon<br>(DB01643)                                                            | no               | yes | no  |
| BURPS668<br>_1544 | NA <sup>+</sup>   | alpha-<br>glucosidase                                          | 3.2.1.20              | O33830 Alpha-<br>glucosidase<br>(DG01769;<br>DB03323)                                                                   | yes<br>lysosomal | no  | no  |
| BURPS668<br>_1669 | valS <sup>+</sup> | valyl-tRNA<br>synthetase                                       | 6.1.1.9               | P26640 Valine--<br>tRNA ligase<br>(DB00161)                                                                             | yes              | no  | no  |
| BURPS668<br>_1712 | thrS <sup>+</sup> | threonyl-<br>tRNA<br>synthetase                                | 6.1.1.3               | P0A8M5<br>Threonine--<br>tRNA ligase<br>(DB03355;<br>DB03869;<br>DB04024)                                               | no               | no  | no  |
| BURPS668<br>_1750 | sucA <sup>+</sup> | 2-<br>oxoglutarate<br>dehydrogen<br>ase E1                     | 1.2.4.2               | Q02218 2-<br>oxoglutarate<br>dehydrogenase,<br>mitochondrial<br>(DB00157;<br>DB00313)                                   | yes              | yes | no  |
| BURPS668<br>_1752 | lpdA <sup>+</sup> | dihydrolipo<br>amide                                           | 1.8.1.4               | P14218<br>Dihydrolipoyl                                                                                                 | no               | yes | no  |



|                   |                   |                                                                                    |           |                                                                                                                                                                                                                    |     |     |    |
|-------------------|-------------------|------------------------------------------------------------------------------------|-----------|--------------------------------------------------------------------------------------------------------------------------------------------------------------------------------------------------------------------|-----|-----|----|
| BURPS668<br>_2178 | purA <sup>+</sup> | dehydrogenase<br>adenylosuccinate<br>synthetase                                    | 6.3.4.4   | dehydrogenase<br>(DB03147)<br>Q83P33<br>Adenylosuccinate<br>synthetase<br>(DB02954;<br>DB04160;<br>DB04566)                                                                                                        | no  | yes | no |
| BURPS668<br>_2189 | hisS <sup>+</sup> | histidyl-<br>tRNA<br>synthetase                                                    | 6.1.1.21  | P60906<br>Histidine--tRNA<br>ligase (DB03811;<br>DB04201)                                                                                                                                                          | no  | no  | no |
| BURPS668<br>_2308 | pgi <sup>+</sup>  | glucose-6-<br>phosphate<br>isomerase                                               | 5.3.1.9   | P06744 Glucose-<br>6-phosphate<br>isomerase<br>(DB02007;<br>DB02076;<br>DB02093;<br>DB02548;<br>DB03042;<br>DB03581;<br>DB03937;<br>DB04493)                                                                       | yes | no  | no |
| BURPS668<br>_2426 | lpxD <sup>+</sup> | UDP-3-O-[3-<br>hydroxymyr-<br>istoyl]<br>glucosamine<br>N-<br>acyltransfera-<br>se | 2.3.1.191 | O67648 UDP-3-<br>O-[3-<br>hydroxymyr-<br>istoyl] N-<br>acetylglucosami-<br>ne deacetylase<br>(DB01991;<br>DB04257;<br>DB04399;<br>DB07355;<br>DB07536;<br>DB08231;<br>DB07861)                                     | no  | yes | no |
| BURPS668<br>_2433 | uppS <sup>+</sup> | undecapren-<br>yl<br>diphosphate<br>synthase                                       | 2.5.1.31  | P60472<br>Ditrans, polycis-<br>undecaprenyl-<br>diphosphate<br>synthase<br>((2E,6E)-<br>farnesyl-<br>diphosphate<br>specific)<br>(DB04695;<br>DB04714;<br>DB07404;<br>DB07409;<br>DB07410;<br>DB07426;<br>DB07780) | no  | yes | no |

|                   |                   |                                                                                                        |          |                                                                                                                                                                                                                                                                         |    |     |    |
|-------------------|-------------------|--------------------------------------------------------------------------------------------------------|----------|-------------------------------------------------------------------------------------------------------------------------------------------------------------------------------------------------------------------------------------------------------------------------|----|-----|----|
| BURPS668<br>_2610 | lpdA <sup>+</sup> | pyruvate<br>dehydrogen<br>ase complex<br>E3<br>component,<br>dihydrolipo<br>amide<br>dehydrogen<br>ase | 1.8.1.4  | P10802<br>Dihydrolipoylly<br>sine-residue<br>acetyltransferase<br>component of<br>pyruvate<br>dehydrogenase<br>complex<br>(DB01846;<br>DB01992;<br>DB08120)                                                                                                             | no | yes | no |
| BURPS668<br>_2788 | fabF <sup>+</sup> | 3-oxoacyl-<br>ACP<br>synthase                                                                          | 2.3.1.41 | Q02054<br>Actinorhodin<br>polyketide<br>synthase acyl<br>carrier protein<br>(DB08585;<br>DB08586)                                                                                                                                                                       | no | no  | no |
| BURPS668<br>_3103 | rfbA <sup>+</sup> | glucose-1-<br>phosphate<br>thymidylyltr<br>ansferase                                                   | 2.7.7.24 | Q9HU22<br>Glucose-1-<br>phosphate<br>thymidylyltrans<br>ferase (DB01643;<br>DB02452;<br>DB02843;<br>DB03723;<br>DB03751;<br>DB04272;<br>DB04485;<br>DB02452;<br>DB04355)                                                                                                | no | yes | no |
| BURPS668<br>_3328 | tgt <sup>+</sup>  | queuine<br>tRNA-<br>ribosyltransf<br>erases                                                            | 2.4.2.29 | P28720 Queuine<br>tRNA-<br>ribosyltransferas<br>e (DB01825;<br>DB02041;<br>DB02441;<br>DB02599;<br>DB03074;<br>DB03304;<br>DB03505;<br>DB03780;<br>DB04004;<br>DB04169;<br>DB04239;<br>DB04543;<br>DB07012;<br>DB07452;<br>DB07481;<br>DB07564;<br>DB07704;<br>DB08267; | no | yes | no |

|                    |                   |                                                                                                                |           |                                                                                                                                                                           |     |     |    |
|--------------------|-------------------|----------------------------------------------------------------------------------------------------------------|-----------|---------------------------------------------------------------------------------------------------------------------------------------------------------------------------|-----|-----|----|
| BURPS668<br>_3366  | ruvB <sup>+</sup> | Holliday<br>junction<br>DNA<br>helicase<br>RuvB                                                                | 3.1.22.4  | DB08268;<br>DB08511;<br>DB08512;<br>DB08514)<br>Q5SL87<br>Holliday<br>junction<br>ATP-<br>dependent<br>DNA<br>helicase<br>RuvB<br>(DB00173)                               | no  | no  | no |
| BURPS668<br>_3464  | aroQ <sup>+</sup> | 3-<br>dehydroqui<br>nate<br>dehydratase                                                                        | 4.2.1.10  | P15474<br>3-<br>dehydroqui<br>nate<br>dehydratase<br>(DB02786;<br>DB02801;<br>DB04347;<br>DB04656;<br>DB08485)                                                            | no  | yes | no |
| BURPS668<br>_3525  | murG <sup>+</sup> | undecapren<br>yldiphospho<br>-<br>muramoylpe<br>ntapeptide<br>beta-N-<br>acetylglucos<br>aminyltransf<br>erase | 2.4.1.227 | P17443<br>UDP-N-<br>acetylglucosami<br>ne--N-<br>acetylmuramyl-<br>(pentapeptide)p<br>yrophosphoryl-<br>undecaprenol N-<br>acetylglucosami<br>ne transferase<br>(DB02196) | no  | yes | no |
| BURPS668<br>_3561  | ung <sup>+</sup>  | uracil-DNA<br>glycosylase                                                                                      | 3.2.2.27  | Q8X444<br>Uracil-<br>DNA<br>glycosylase<br>(DB03419)                                                                                                                      | no  | yes | no |
| BURPS668<br>_3668  | murA <sup>+</sup> | UDP-N-<br>acetylglucos<br>amine 1-<br>carboxyvinyl<br>ltransferase                                             |           | P33038<br>UDP-N-<br>acetylglucosami<br>ne 1-<br>carboxyvinyltra<br>nsferase<br>(DB01879;<br>DB02435;<br>DB02995;<br>DB03089;<br>DB04174;<br>DB04474)                      | no  | yes | no |
| BURPS668<br>_A0384 | acnD <sup>+</sup> | aconitate<br>hydratase                                                                                         | 4.2.1.3   | Q99798<br>Aconitate<br>hydratase,<br>mitochondrial<br>(DB01727;<br>DB03964;<br>DB04072;<br>DB04351;                                                                       | yes | yes | no |

|                    |                   |                                                                 |          |                                                                                                                                                            |              |  |     |    |
|--------------------|-------------------|-----------------------------------------------------------------|----------|------------------------------------------------------------------------------------------------------------------------------------------------------------|--------------|--|-----|----|
|                    |                   |                                                                 |          | DB04562);<br>P36683<br>Aconitate<br>hydratase<br>(DB04351)                                                                                                 | 2            |  |     |    |
| BURPS668<br>_A1869 | ileS <sup>+</sup> | isoleucyl-<br>tRNA<br>synthetase                                | 6.1.1.5  | P41972<br>isoleucyl-tRNA<br>synthetase<br>(DB00410)                                                                                                        | no           |  | no  | no |
| BURPS668<br>_A2053 | NA <sup>+</sup>   | putative<br>acetyl-CoA<br>carboxylase,<br>biotin<br>carboxylase | 6.3.4.14 | P24182<br>carboxylase<br>(DB08074;<br>DB08075;<br>DB08076;<br>DB08144;<br>DB08145;<br>DB08146;<br>DB08314;<br>DB08315;<br>DB08316;<br>DB08317;<br>DB08318) | Biotin<br>no |  | yes | no |
| BURPS668<br>_A2451 | leuB <sup>+</sup> | 3-<br>isopropylma<br>late<br>dehydrogen<br>ase                  | 1.1.1.85 | Q56268<br>isopropylmalate<br>dehydrogenase<br>(DB04279)                                                                                                    | 3-<br>no     |  | yes | no |
| BURPS668<br>_A2546 | polA <sup>+</sup> | DNA<br>polymerase I                                             | 2.7.7.7  | P00582<br>polymerase<br>I<br>(DB00548;<br>DB08432)                                                                                                         | DNA<br>no    |  | yes | no |
| BURPS668<br>_A3190 | lpdA <sup>+</sup> | dihydrolipo<br>amide<br>dehydrogen<br>ase                       | 1.8.1.4  | P09063<br>Dihydrolipoyl<br>dehydrogenase<br>(DB03147)                                                                                                      | no           |  | yes | no |

269 \* mutants exist in other *Burkholderia* species, +essential gene in *B. pseudomallei* K96243 and MSHR668

270 Eight of the targets in Table 3 were also DrugBank targets in human; DrugBank was searched for the  
271 remaining twenty-six targets, showing that they also occur in other bacteria.

272 *In silico* knockout experiments were performed with the MetaFlux module of Pathway Tools to  
273 test the effect of inhibiting each chokepoint enzyme on *B. pseudomallei* growth in both the  
274 unconstrained and LB media models. Results (Table 4) show that knockout of BURPS668\_3328 (*tgt*)  
275 and BURPS668\_A2451 (*leuB*), eliminated the biomass flux in the unconstrained model, while  
276 knockout of BURPS668\_2426 (*lpxD*), BURPS668\_2433 (*uppS*), and BURPS668\_3525 (*murG*) eliminated  
277 the biomass flux in the LB media model. Knockout of BURPS668\_2433 (*uppS*), and BURPS668\_3525  
278 (*murG*) decreased the biomass flux in the unconstrained model, but did not eliminate it.

279

280 **Table 4.** Results of *in silico* knockout experiments on twenty-six chokepoint reactions in *B.*  
281 *pseudomallei*

| locus_tag     | Gene name | Reaction(s)                                                                                                        | Biomass flux (unconstrained model) | Biomass flux (LB media model) |
|---------------|-----------|--------------------------------------------------------------------------------------------------------------------|------------------------------------|-------------------------------|
| BURPS668_0305 | argG      | ARGSUCCINSYN-RXN                                                                                                   | 15000.000000                       | 0.079412                      |
| BURPS668_0328 | folB      | H2NEOPTERINALDOL-RXN                                                                                               | 15000.000000                       | 0.079412                      |
| BURPS668_0675 | aspS      | ASPARTATE--TRNA-LIGASE-RXN-ASP-tRNAs/L-ASPARTATE/ATP/PROTON//Charged-ASP-tRNAs/AMP/PPI.60                          | 15000.000000                       | 0.079412                      |
| BURPS668_0810 | recA      | RXN0-5100                                                                                                          | 15000.000000                       | 0.079412                      |
| BURPS668_0964 | dut       | DUTP-PYROP-RXN                                                                                                     | 15000.000000                       | 0.079412                      |
| BURPS668_1465 | dnaQ      | DNA-DIRECTED-DNA-POLYMERASE-RXN                                                                                    | 15000.000000                       | 0.079412                      |
| BURPS668_1712 | thrS      | THREONINE--TRNA-LIGASE-RXN-THR-tRNAs/THR/ATP/PROTON//Charged-THR-tRNAs/AMP/PPI.52                                  | 15000.000000                       | 0.079412                      |
| BURPS668_1752 | lpdA      | RXN-9718                                                                                                           | 15000.000000                       | 0.079412                      |
| BURPS668_2178 | purA      | ADENYLOSUCCINATE-SYNTHASE-RXN                                                                                      | 15000.000000                       | 0.079412                      |
| BURPS668_2189 | hisS      | HISTIDINE--TRNA-LIGASE-RXN-HIS-tRNAs/HIS/ATP/PROTON//Charged-HIS-tRNAs/AMP/PPI.52                                  | 15000.000000                       | 0.079412                      |
| BURPS668_2426 | lpxD      | UDPHYDROXYMYRGLUCOSAM NACETYLTRANS-RXN-R-3-hydroxymyristoyl-ACPs/UDP-OHMYR-GLUCOSAMINE//OH-MYRISTOYL/ACP/PROTON.73 | 15000.000000                       | 0.000000                      |
| BURPS668_2433 | uppS      | RXN-8999                                                                                                           | 14545.454545                       | 0.000000                      |
| BURPS668_2610 | lpdA      | 1.8.1.4-RXN                                                                                                        | 15000.000000                       | 0.079412                      |
| BURPS668_2788 | fabF      | 3-OXOACYL-ACP-SYNTH-RXN /3-OXOACYL-ACP-SYNTH-BASE-RXN /2.3.1.41-RXN / many other reactions                         | 15000.000000                       | 0.079412                      |
| BURPS668_3103 | rfbA      | DTDPGLUCOSEPP-RXN                                                                                                  | 15000.000000                       | 0.079412                      |
| BURPS668_3328 | tgt       | QUEUOSINE-TRNA-RIBOSYLTRANSFERASE-RXN; RXN0-1321                                                                   | 0.000000                           | 0.079412                      |
| BURPS668_3366 | ruvB      | 3.1.22.4-RXN                                                                                                       | 15000.000000                       | 0.079412                      |
| BURPS668_3464 | aroQ      | 3-DEHYDROQUINATE-DEHYDRATASE-RXN                                                                                   | 15000.000000                       | 0.079412                      |
| BURPS668_3525 | murG      | RXN-11346, RXN-8976, NACGLCTRANS-RXN, RXN-11029                                                                    | 10000.000000                       | 0.000000                      |
| BURPS668_3561 | ung       | RXN0-2584                                                                                                          | 15000.000000                       | 0.079412                      |

|                |      |                                            |              |          |
|----------------|------|--------------------------------------------|--------------|----------|
| BURPS668_3668  | murA | UDPNACETYLGLUCOSAMENOL<br>PYRTRANS-RXN     | 15000.000000 | 0.079412 |
| BURPS668_A1869 | ileS | ISOLEUCINE--TRNA-LIGASE-<br>RXN            | 15000.000000 | 0.079412 |
| BURPS668_A2053 | acc  | BIOTIN-CARBOXYL-RXN                        | 15000.000000 | 0.079412 |
| BURPS668_A2451 | leuB | RXN-13158;<br>ISOPROPYLMALDEHYDROG-<br>RXN | 3- 0.000000  | 0.079412 |
| BURPS668_A2546 | polA | DNA-DIRECTED-DNA-<br>POLYMERASE-RXN        | 15000.000000 | 0.079412 |
| BURPS668_A3190 | lpdA | 1.8.1.4-RXN/RXN0-1132/RXN-8629             | 15000.000000 | 0.079412 |

282 The overall biomass fluxes were different in the two models. The unconstrained model had a much  
283 greater total biomass flux than the LB media model. This is likely because the unconstrained model  
284 included more nutrient inputs than the LB media model.

## 285 4. Discussion

### 286 4.1 Links between metabolism and virulence

287 In order to colonize the host, establish an infection, and proliferate, pathogens employ various  
288 strategies, often involving links between metabolic pathways and virulence genes. Although current  
289 knowledge regarding the connections between metabolism and virulence is limited [60], this topic is  
290 becoming an increasing focus for host-pathogen studies. Some general links between metabolism and  
291 virulence include regulatory connections between specific metabolites and virulence gene expression  
292 [61-65], metabolic requirements for adaptation of the pathogen to the host niche [59,60,66,67], and  
293 carbon catabolite repression [68]. More detailed information on the topic of metabolism and virulence  
294 can be found in reviews [59,60,66,67,69-74].

295 Inside host cells, the survival of pathogenic bacteria depends on their acquisition of nutrients  
296 and carbon sources, such as carbohydrates, lipids, glycolipids, dicarboxylic acids and amino acids,  
297 from their host environment [59,60,66,67,71,75]. Preferred carbon sources vary among intracellular  
298 pathogens, and the types of nutrients available in the host cell cytosol may determine the cell-type  
299 specificities of different intracellular pathogens [76]. For example, many bacteria prefer hexoses, like  
300 glucose, as sources of carbon and energy. These sugars are catabolized through glycolysis, the  
301 pentose phosphate and Entner-Doudoroff pathways [75]. Some bacteria lack the glycolysis pathway  
302 and preferentially metabolize glucose via the Entner-Doudoroff pathway [77], while others lack both  
303 glycolysis and Entner-Doudoroff pathways and live on pyruvate that they obtain from the host cell  
304 cytosol [78].

### 305 4.2 Metabolic potential of *B. pseudomallei* MSHR668

306 We previously reported that *B. pseudomallei* MSHR668, K96243 and 1106a have abundant  
307 capabilities to metabolize hexoses, including the complete sets of genes encoding the glycolysis,  
308 pentose phosphate cycle, and Entner-Doudoroff pathways. They also have several pathways for  
309 metabolism of pyruvate to acetyl-CoA, acetate and ethanol [37]. In general, *B. pseudomallei* as a species  
310 has a very diverse set of metabolic capabilities, likely a reflection of its ability to live both in the  
311 natural environment and in hosts.

312 The metabolic power of *B. pseudomallei* has been targeted in mutation studies to address the roles  
313 of various metabolic genes in virulence. Mutation of various metabolic genes that affect cell growth  
314 results in attenuation of *B. pseudomallei* virulence; these genes include

315 phosphoribosylformylglycinamidine cyclo-ligase (*purM*) [79], aspartate- $\alpha$ -semialdehyde  
316 dehydrogenase (*asd*) [80], acetolactate synthase (*ilvI*) [21], dehydroquinase synthase (*aroB*) [20],  
317 chorismate synthase (*aroC*) [17], phosphoserine aminotransferase (*serC*) [81],  
318 phosphoribosylglycinamide formyltransferase 1 (*purN*) and phosphoribosylformylglycinamide  
319 cyclo-ligase (*purM*) [18], two phospholipase C enzymes [82], disulfide oxidoreductase (*dsbA*) [83].  
320 Targeted mutation of *purM*, which encodes aminoimidazole ribotide, a precursor of de novo adenine  
321 and thiamine biosynthesis, predictably causes a deficiency in adenine and thiamine biosynthesis [79].  
322 Aspartate- $\alpha$ -semialdehyde dehydrogenase (*asd*) mutants cannot synthesize diaminopimelate for cell  
323 wall biosynthesis [80], while acetolactate synthase (*ilvI*) mutants cannot synthesize the branched  
324 chain amino acids isoleucine, valine, and leucine [21]. Dehydroquinase synthase (*aroB*) mutants are  
325 defective in the shikimate pathway for chorismate biosynthesis, and addition of the aromatic  
326 compounds tyrosine, tryptophan, phenylalanine, PABA, and 2,3-dihydroxybenzoate is required to  
327 restore the growth in minimal medium [20]. Chorismate synthase (*aroC*) mutants are also defective  
328 in aromatic compound synthesis and cannot grow without the addition of aromatic compounds to  
329 the media [17]. Phosphoserine aminotransferase (*serC*) mutants are defective in serine and pyridoxal  
330 5-phosphate biosynthesis and require minimal medium supplemented with serine for normal growth  
331 [81].

#### 332 4.3 Vaccine studies

333 Using live attenuated bacteria as vaccines can be effective in preventing disease, as attenuated  
334 bacteria may still be able to replicate in the host and may contain immune-stimulatory epitopes that  
335 are not found in subunit or heat-inactivated vaccines [84]. Many of the *B. pseudomallei* mutants  
336 described above have already been tried as attenuated vaccines with mixed results. Vaccination with  
337 the attenuated *asd* mutant protected BALB/c mice against acute melioidosis, but did not protect  
338 against chronic melioidosis [80]. Vaccination with the attenuated *ilvI* mutant of *B. pseudomallei*  
339 protected BALB/c mice against a challenge with a virulent strain [21]. In mice vaccinated with the  
340 *aroB* mutant, the time to death following challenge with the virulent K96243 strain was a bit longer  
341 than in unvaccinated mice, but all mice eventually died [20]. The *aroC* mutant was unable to persist  
342 in vaccinated BALB/c mice long enough to elicit protective immunity, however C57BL/6 mice were  
343 protected against challenge with a virulent strain [17]. Intraperitoneal vaccination of BALB/c mice  
344 with a *serC* mutant resulted in higher levels of survival after challenge with K96243 virulent strain  
345 [81]. While immunization of mice with attenuated *B. pseudomallei* mutants has resulted in the  
346 induction of protective immunity in some cases, sterile immunity was rarely reported (reviewed by  
347 [85]). Also, the live attenuated vaccine model may not be the best solution for the prevention of  
348 melioidosis, because an attenuated mutant might revert to virulence, and might also establish a latent  
349 infection [85].

#### 350 4.4 Identification of antimicrobial therapeutics

351 An alternative avenue to combat melioidosis is through the development of novel antimicrobial  
352 therapeutics. Regardless of the specific metabolic capabilities possessed by a pathogen, essential  
353 nutrient acquisition and utilization mechanisms are proving to be good potential therapeutic targets,  
354 as inhibition of these targets might deprive the pathogen of needed substrates for growth and  
355 replication inside host cells [31]. There are currently 699 *B. pseudomallei* genomes available at the  
356 National Center for Biotechnology Information (NCBI, <http://www.ncbi.nlm.nih.gov/genome/476>).  
357 While some of these entries represent re-annotations of previous submissions, and some genomes  
358 represent colony morphology variants of the same strain, an impressive number of individual  
359 genomes are available to use with computational approaches to identify new therapeutic targets.  
360 With this large number of available genomes, a core genome approach [86,87] could be used to  
361 identify potential metabolic enzyme targets that are present in all sequenced *B. pseudomallei* genomes.

362 *In silico* methods for the identification of therapeutic targets in bacterial pathogens include  
363 comparative genomics-based approaches, such as identification of essential genes specific to the

364 pathogen, and techniques based on metabolic pathway analysis and metabolic network modeling.  
365 The more robust approaches use a combination of comparative genomics and metabolic pathway  
366 analysis. These approaches have been used to identify essential gene targets in *Mycoplasma genitalium*  
367 [88] and *Mycobacterium ulcerans* [89]. Another method, subtractive target identification, involves  
368 identification of enzymes in the metabolic pathways of the pathogen, and comparing them to human  
369 proteins to identify pathogen enzymes that are not found in human. A list of likely targets is compiled  
370 by focusing on enzymes in pathways that are usually essential for pathogen growth and survival,  
371 like lipid metabolism, carbohydrate metabolism, amino acid metabolism, energy metabolism,  
372 vitamin and cofactor biosynthetic pathways and nucleotide metabolism. This approach has been used  
373 to identify putative targets in *M. tuberculosis* [90], MRSA [91-93], as well as a collection of other  
374 bacterial pathogens [94].

375 Methods for therapeutic target discovery based on metabolic pathway analysis and metabolic  
376 network modeling have become very popular in the last ten years. Numerous studies have identified  
377 candidate drug targets in various bacterial [27,34,95-106], fungal [106] and protozoan [31,106-109]  
378 pathogens using a variety of methods to analyze metabolic pathways and networks. One method  
379 employs chokepoint analysis to identify metabolic enzymes that are critical to the pathogen, because  
380 they uniquely consume and/or produce certain metabolites. Chokepoint analysis has been used to  
381 identify candidate metabolic enzyme targets in various pathogen genomes  
382 [27,31,34,99,107,108,110,111]. However, no studies to date have used this approach to identify  
383 potential drug targets in *B. pseudomallei* metabolic networks.

#### 384 4.4.1 Identification of metabolic chokepoints

385 For this study, metabolic chokepoints were identified in the curated *B. pseudomallei* MSHR668  
386 metabolic network using the Pathway Tools software [35]. Table 3 lists the chokepoint enzymes  
387 identified in the metabolic networks of *B. pseudomallei* MSHR668 and K96243. Twenty-four of the *B.*  
388 *pseudomallei* chokepoints were not indicated as human targets in DrugBank, and therefore  
389 represented good candidate therapeutic targets against melioidosis. Six of the chokepoints in Table 3  
390 were aminoacyl-tRNA synthetases, which are likely good targets as they are critical enzymes  
391 involved in protein translation. These chokepoints included aspartyl-, threonyl-, histidyl-, valyl- and  
392 isoleucyl-tRNA synthetase (2 copies). Aspartyl-tRNA synthase (*aspS*) is an essential gene target in *M.*  
393 *tuberculosis* [112]. Threonyl-tRNA synthetase (*thrS*) inhibitors have been identified [113] and shown  
394 to have anti-malarial activity against *Plasmodium falciparum* [114]. Isoleucyl-tRNA synthetase (*ileS*) is  
395 a well-documented bacterial target [115-117]. The antimicrobial drug, mupirocin (pseudomonic acid),  
396 selectively inhibits bacterial isoleucyl-tRNA synthetase without inhibiting its human homolog [114].  
397 However, resistance is seen in bacteria that possess an isoleucyl-tRNA synthetase that is similar to  
398 eukaryotic versions [118]. Histidyl-tRNA synthetase (*hisS*) has been explored as a target in  
399 *Trypanosoma cruzi* [119]. The chokepoint enzyme queuine tRNA-ribosyltransferase (*tgt*) incorporates  
400 the wobble base queuine into tRNA, and is also a target in *Zymomonas mobilis* and *Shigella* [120,121]

401 Several *B. pseudomallei* chokepoint enzymes are likely involved in DNA-related processes. Two  
402 of these enzymes, encoded by the *recA* and *dnaQ* genes, are involved in the SOS pathway [122], which  
403 mediates the bacterial response to DNA damage. Activation of the SOS response by ciprofloxacin  
404 induces mutations, which can lead to fluoroquinolone resistance [123]. The RecA protein is a target  
405 for antibacterial drug discovery in *M. tuberculosis* [124] and *Mycoplasma hyopneumoniae* [96], and has  
406 been proposed as a specific target for reducing the evolution of antimicrobial resistance [125]. The  
407 chokepoint enzyme deoxyuridine 5'-triphosphate nucleotidohydrolase (dUTPase) prevents  
408 incorporation of uracil into DNA and is important for DNA integrity [126]. dUTPase is a potential  
409 antimalarial drug target against *P. falciparum* [127,128]. Holliday junction DNA helicase (*ruvB*)  
410 participates in homologous recombination and repair of replication forks, and is therefore essential  
411 for bacterial growth. Holliday junction processing components were previously identified as targets  
412 for antimicrobials in *E. coli* [129] and *Neisseria gonorrhoeae* [130]. The chokepoint enzyme uracil-DNA  
413 glycosylase (*ung*) has a role in uracil excision repair, and is a candidate anti-malarial drug target [131],  
414 as well as a potential target to control growth of GC-rich bacteria such as *Pseudomonas aeruginosa* and



415 *Mycobacterium smegmatis* [132]. DNA polymerase I was identified as a chokepoint in *B. pseudomallei*.  
416 Putative inhibitors of DNA polymerase I (*polA*), and subsequently DNA synthesis, have been  
417 explored as possible antimicrobials [133,134].

418 Some chokepoint enzymes in *B. pseudomallei* have annotated functions in the biosynthesis of cell  
419 wall components. One of these, UDP-3-O-[3-hydroxymyristoyl] glucosamine N-acyltransferase  
420 (*lpxD*), catalyzes the third step in the lipid A biosynthesis pathway [135]. The lipid A component of  
421 bacterial LPS is of particular interest because it is essential for cell viability and is highly conserved  
422 [136]. This pathway is a target for new antibacterial therapeutics in *Escherichia coli* [137]. Another  
423 chokepoint involved in cell wall synthesis is undecaprenyl diphosphate synthase (*uppS*), which  
424 catalyzes the synthesis of a polyisoprenoid essential for both peptidoglycan and cell wall teichoic  
425 acid synthesis. UppS is a critical enzyme required for bacterial survival, and is an antibacterial target  
426 in *Staphylococcus aureus* [138], *Bacteroides fragilis*, *Vibrio vulnificus*, *E. coli* [139] and *H. pylori* [140].  
427 Several classes of compounds that inhibit UppS function have been discovered [138,141,142]. Two  
428 additional *B. pseudomallei* chokepoints, undecaprenyldiphospho-muramoylpentapeptide beta-N-  
429 acetylglucosaminyltransferase (*murG*), and UDP-N-acetylglucosamine 1-carboxyvinyltransferase  
430 (*murA*) are likely involved in peptidoglycan biosynthesis. MurG is the target of the antibiotic  
431 ramoplanin in *Staphylococcus aureus* [143]. Other potential inhibitors of MurG have been identified by  
432 high throughput screening [144]. A small molecule inhibitor of MurG that augments the activity of  
433  $\beta$ -lactams against methicillin-resistant *Staphylococcus aureus* was recently identified [145]. MurA has  
434 been a popular target for the design of novel antibiotics, and several inhibitors of MurA have been  
435 identified that are active against various bacterial species [91,146-151]. The chokepoint enzyme  
436 glucose-1-phosphate thymidyltransferase (*rfaA/rmlA*), involved in O antigen biosynthesis, is also a  
437 target in *Streptococcus pneumoniae* [152] and *Pseudomonas aeruginosa* [153].

438 The rest of the chokepoint enzymes in Table 3 are components of various biosynthesis pathways.  
439 These enzymes include argininosuccinate synthase (*argG*), which catalyzes the second to last step in  
440 L-arginine biosynthesis, and is associated with pathogenesis in the parasite *Leishmania donovani* [154],  
441 *Streptococcus pneumoniae* [155], and *B. cenocepacia* [156]. The chokepoint enzyme 3-isopropylmalate  
442 dehydrogenase (*leuB*) is the third enzyme specific to leucine biosynthesis in microorganisms [157],  
443 and has been investigated as an antibacterial target in *M. tuberculosis* [158]. The *B. pseudomallei*  
444 chokepoint dihydroneopterin aldolase (*folB*) is part of the tetrahydrofolate biosynthesis process, and  
445 is essential for growth and biomass production in *Acinetobacter baylyi*, *Bacillus anthracis*, *Francisella*  
446 *tularensis*, *F. tularensis* subsp. *novicida* strain U112, *Mycobacterium tuberculosis*, *Helicobacter pylori*,  
447 *Pseudomonas aeruginosa*, *Salmonella enterica* serovar Typhi and *Yersinia pestis* [95]. Three of the  
448 chokepoint genes identified in *B. pseudomallei* encoded lipoamide dehydrogenase, a component of the  
449 pyruvate dehydrogenase complex, which converts pyruvate to acetyl-CoA as part of central  
450 metabolism [159]. Lipoamide dehydrogenase is also a target in *M. tuberculosis*, where deletion  
451 drastically impaired the pathogen's ability to establish infection in the mouse [160]. The  
452 mycobacterial version has only 36% identity with the human homolog. Lipoamide dehydrogenase is  
453 a target of drugs against trypanosomal infections [161]. Adenylosuccinate synthetase (*purA*) is also a  
454 chokepoint enzyme and potential therapeutic target that is involved in purine salvage in *Leishmania*  
455 *donovani* [162]. Chokepoint enzyme 3-dehydroquinate dehydratase (*aroQ*) is a component of the  
456 shikimate pathway for chorismate biosynthesis and is a target of known inhibitors in *M. tuberculosis*,  
457 *Enterococcus faecalis* and *Streptomyces coelicolor* [163-167].

458 The *B. pseudomallei* chokepoint enzyme 3-oxoacyl-ACP synthase (*fabF*), involved in fatty acid  
459 synthesis, is already an antibacterial target in *E. coli*, and a specific inhibitor, cerulenin, has been  
460 identified [168,169]. Another fatty acid synthesis chokepoint enzyme in *B. pseudomallei* was a biotin-  
461 dependent acetyl-CoA carboxylase. Biotin dependent carboxylases comprise a large group of  
462 enzymes that participate in a variety of cellular processes, including fatty acid metabolism, amino  
463 acid metabolism, carbohydrate metabolism, polyketide biosynthesis, urea utilization, etc. (reviewed  
464 by [170]). Acetyl-CoA carboxylase is comprised of two enzymes, biotin carboxylase and  
465 carboxyltransferase, and catalyzes the first committed step in fatty acid synthesis [171]. Acetyl-CoA  
466 carboxylase is an antimicrobial target in *M. tuberculosis* [172], *E. coli* [173,174], other bacteria and most

467 living organisms (reviewed by [175]). All of the chokepoints in Table 3 are essential genes in *B.*  
468 *pseudomallei* MSHR668 and K96243, as determined by blasting the chokepoint enzyme sequences  
469 against essential gene sequences in the Database of Essential Genes [176] and by comparing to the list  
470 of essential genes previously identified in K96243 [177].

471 To determine if *B. pseudomallei* deletion mutants were available for each of the chokepoints in  
472 Table 3, searches of the internet, PubMed, and the Burkholderia Genome Database  
473 (<http://burkholderia.com>) were performed. Based on these searches, none of the chokepoint enzymes  
474 in Table 3 had a mutant available; however, a *B. cenocepacia argG* mutant has attenuated virulence  
475 [178], and *recA* mutants have been identified in *B. cepacia* [179].

476 Additional metabolic enzymes, not identified as chokepoints in this study, and pathways critical  
477 for bacterial growth and survival have been mentioned with respect to target identification. These  
478 include anaplerotic pathways that turned on by limiting carbon sources [180], the glyoxalate shunt  
479 enzyme isocitrate lyase [16,181,182], involved in the metabolism of fatty acids [15,181], enoyl-ACP  
480 reductase (FabI) in the type II fatty acid biosynthesis pathway [183], and alanine racemase [23].

#### 481 4.4.2 Flux balance analysis

482 To gain an understanding of the metabolic processes in *B. pseudomallei* MSHR668 that are active  
483 under different environmental conditions, and to test the effect of deletion of each chokepoint enzyme  
484 on the growth of *B. pseudomallei* *in silico*, metabolic network models were constructed and FBA was  
485 performed. The first FBA model, of the unconstrained network in MSHR668, included all possible  
486 biomass compounds that could be produced, all nutrients that could be consumed, had no weights  
487 imposed on the biomass metabolites and no constraints imposed on the nutrients. [Supplementary  
488 material, S1\_Final\_unconstrained\_model\_inputs.pdf, S2\_Final\_unconstrained\_model\_solution.pdf].  
489 This model likely represents the metabolic potential of *B. pseudomallei* in a soil or water environment  
490 where abundant carbon and nitrogen sources are available. To mimic the conditions that *B.*  
491 *pseudomallei* experiences in culture, a separate model was constructed that provided only the  
492 nutrients present in LB media plus glycerol [43]. Constraints were included on some of the nutrients  
493 in this model (ADP, Pi, proton and glycerol). [Supplementary material,  
494 S3\_Final\_LB\_model\_inputs.pdf, S4\_Final\_LB\_model\_solution.pdf]. A third model was attempted, to  
495 mimic infection conditions using only the nutrients present in the host cell cytosol. However, no  
496 comprehensive studies have identified a complete list of host cell nutrients that are available to *B.*  
497 *pseudomallei* during infection. Also, the specific carbon requirements of *B. pseudomallei* in either  
498 human macrophages or amoebae have not been determined. After trying to compile a list of nutrients  
499 that mimic the content of the host cytosol, from the literature and from gene expression studies of *B.*  
500 *pseudomallei* during infection, this model did not produce a solution so it was abandoned. However,  
501 the LB media model contained a similar set of nutrients to those used by the intracellular pathogen  
502 *L. pneumophila* [47,48,50], so it may in fact be somewhat representative of infection conditions.

503 *In silico* knockout experiments were performed, where each chokepoint enzyme was knocked  
504 out, one at a time, to assess the effect on the total flux through the unconstrained and LB media  
505 models. Five chokepoint enzymes, when knocked out, had an effect on the models (Table 4).  
506 Specifically, knocking out BURPS668\_3328 (*tgt*) and BURPS668\_A2451 (*leuB*), eliminated the biomass  
507 flux in the unconstrained model, while knockout of BURPS668\_2426 (*lpxD*), BURPS668\_2433 (*uppS*),  
508 and BURPS668\_3525 (*murG*) eliminated the biomass flux in the LB media model. Knockout of  
509 BURPS668\_2433 (*uppS*), and BURPS668\_3525 (*murG*) decreased the biomass flux in the unconstrained  
510 model, but did not eliminate it. The metabolic pathways that these enzymes belong to are shown in  
511 Figure 2.

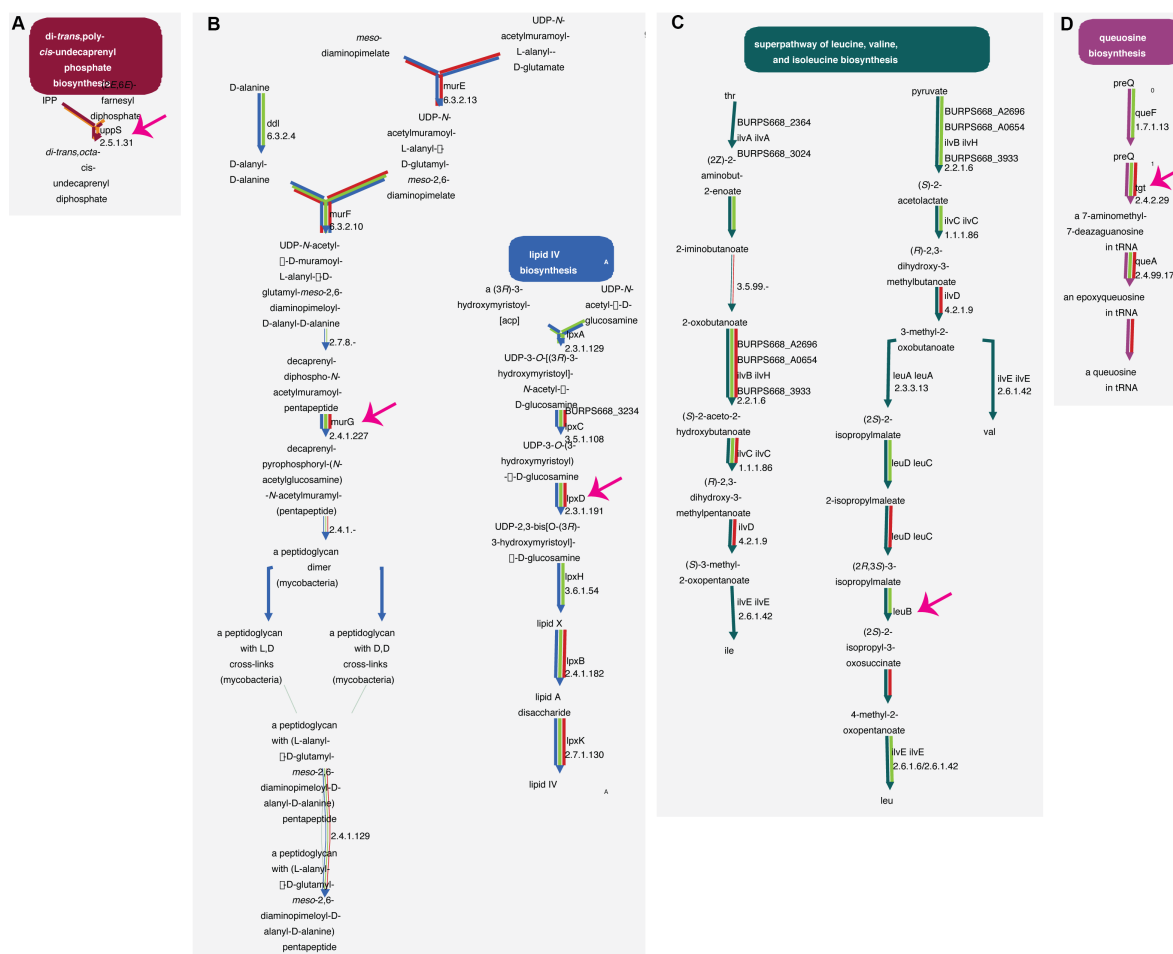

512

513 **Figure 2.** Metabolic pathways in *B. pseudomallei* MSHR668 that show reduced flux when chokepoint  
 514 enzymes (indicated by pink arrows) are deleted. A. The mono-trans, poly-cis decaprenyl phosphate  
 515 biosynthesis pathway that contains the chokepoint enzyme undecaprenyl diphosphate synthase  
 516 (*uppS*). B. The two chokepoints UDP-N-acetylglucosamine--N-acetylmuramyl-(pentapeptide)  
 517 pyrophosphoryl-decaprenol N-acetylglucosamine transferase (*murG*) and UDP-3-O-(R-3-  
 518 hydroxymyristoyl)-glucosamine N-acyltransferase (*lpxD*), involved in peptidoglycan and lipid A  
 519 biosynthesis, respectively. C. The chokepoint enzyme tRNA-guanine transglycosylase (*tgt*), involved  
 520 in queosine biosynthesis. D. The 3-isopropylmalate dehydrogenase (*leuB*) chokepoint enzyme  
 521 performs the third step in leucine biosynthesis. *In silico* deletion of UDP-3-O-(R-3-hydroxymyristoyl)-  
 522 glucosamine N-acyltransferase (*lpxD*) reduced flux through the *B. pseudomallei* metabolic network in  
 523 the LB media model, deletion of undecaprenyl diphosphate synthase (*uppS*) reduced flux through  
 524 both unconstrained and LB media models, and deletion of tRNA-guanine transglycosylase (*tgt*) and  
 525 3-isopropylmalate dehydrogenase (*leuB*) reduced flux in the unconstrained model. These pathways  
 526 were rendered by the Cellular Overview feature of Pathway Tools.

528 In terms of carbon sources, glucose was utilized as a nutrient in the unconstrained model of *B.*  
 529 *pseudomallei* MSHR668. However, when glycerol was replaced by glucose in the LB media model, no  
 530 FBA solution was found [data not shown]. This was a somewhat unexpected result, as *B. pseudomallei*  
 531 can utilize glucose as a carbon source in culture [184]. One possible explanation for this result is that  
 532 additional nutrients required for glucose utilization were missing from the input nutrients list. Co-  
 533 metabolism of more than one carbon substrate is a metabolic strategy employed by intracellular  
 534 bacteria replicating inside host cells to provide carbon for energy and biosynthesis [59]. For example,  
 535 *Listeria monocytogenes* can use both glycerol and lactate as carbon sources, [57,185-187]. It has been  
 536 suggested that during infection by *Listeria*, the host cell may not contain enough glucose to activate  
 537 bacterial PTS glucose transporters, so alternative carbon sources are important for survival and  
 538 virulence of the pathogen [57]. *M. tuberculosis* also relies on glycerol and fatty acids as carbon sources

539 in the macrophage environment [188] As the unconstrained *B. pseudomallei* model included a much  
540 longer list of nutrients than the LB model and also could use glucose as a nutrient, this could be the  
541 case. Another explanation for glucose not being utilized by the LB media model is that intracellular  
542 bacteria seem to prefer other substrates over glucose during infection [189], and glycerol may be a  
543 major carbon source for intracellular bacteria during infection [189,190]. This may also be the  
544 situation for *B. pseudomallei* inside host cells. Glycerol feeds into the second half of the  
545 glycolysis/gluconeogenesis pathway through its conversion to dihydroxyacetone phosphate  
546 [www.metacyc.org; [191]], bypassing the first four steps of glycolysis. We previously determined that  
547 the *B. pseudomallei* MSHR668 genome has the full set of genes to perform this conversion [37]. Two  
548 studies of *L. monocytogenes* infection support the idea that intracellular pathogens generally may use  
549 glycerol rather than glucose as a main carbon source while inside host cells. Transcription profiles of  
550 *L. monocytogenes* grown in mouse macrophages showed reduced expression of genes encoding some  
551 of the enzymes involved in glycolysis, in particular phosphoglucose isomerase (*pgi*), which converts  
552 glucose-6-phosphate into fructose-6-phosphate, and the five steps involved in the conversion of  
553 glyceraldehyde-3-phosphate to pyruvate [189]. Similar transcription profiles were seen during *L.*  
554 *monocytogenes* infection of Caco-2 epithelial cells [192]. Both studies showed increased expression of  
555 genes involved in the uptake and utilization of glycerol [189,192]: these genes were *glpF*, *glpK*, *glpD*  
556 and *dhaK*.

557 To date, no study has determined precisely which carbon substrates are utilized by *B.*  
558 *pseudomallei* during infection of host cells. In addition to glycerol, there is evidence that *B. pseudomallei*  
559 may utilize aromatic carbon compounds such as benzoate and phenylacetic acid as carbon sources  
560 for intracellular survival [53]. One study showed that in *B. pseudomallei* 1026b, glycolytic pathway  
561 and TCA cycle genes were down-regulated during infection of hamster [193], supporting the idea  
562 that *B. pseudomallei* may prefer carbon sources other than glucose while inside host cells. Other studies  
563 examined genes induced by hypoxia, which is a condition present in infected macrophages [194] and  
564 changes in *B. pseudomallei* gene expression during infection of rat lungs {van Schaik, 2008 #194.

565 Complicating the situation even more, the complete nutrient content of a representative  
566 mammalian host cell cytosol has not been determined yet, so a consensus set of nutrients present in  
567 the cytosol of different host cell types is still out of reach {Eisenreich, 2013 #40}. This is largely due to  
568 the challenges in designing appropriate infection models and robust analytical approaches to  
569 measure metabolic changes occurring in host cells during infection. Because of these limitations on  
570 both the pathogen and host sides, it is difficult to predict which carbon sources pathogens can use to  
571 grow inside host cells. While we don't know the exact biochemical composition of a mammalian cell  
572 cytosol, we do know some details about mammalian cells in general. For example, the cytosol of a  
573 typical cell has low magnesium, sodium and calcium concentrations, and a high potassium  
574 concentration at neutral pH [195]. In addition, mammalian cells contain small amounts of amino  
575 acids, plus significant amounts of TCA cycle intermediates [196,197]. Once inside host cells,  
576 intracellular bacteria may stimulate host cell responses to produce needed nutrients [190]. However,  
577 host-pathogen interactions during infection are complicated, as some host defense responses are  
578 aimed at inhibiting pathogen survival and proliferation, for instance by decreasing metabolic  
579 activities that provide nutrients to the pathogen [180].

## 580 5. Conclusions

581 This work is the first to use genome scale metabolic modeling to address *B. pseudomallei*  
582 metabolism as a source of new drug targets. While identifying the nutrients available to *B.*  
583 *pseudomallei* inside host cells was difficult, the effort described here identified a set of twenty-six  
584 chokepoint enzyme drug targets; *in silico* deletion of five of these target enzymes reduced the total  
585 biomass flux through the *B. pseudomallei* metabolic network. While a genome-based approach like  
586 this can streamline the initial steps of antibacterial target identification, the true utility of this process  
587 will be demonstrated when the targets are experimentally verified by performing knockout  
588 experiments in culture, followed by efficacy testing of candidate drugs in culture and in animal  
589 models of infection.

590 **Supplementary Materials:** The following are available online at [www.mdpi.com/link,](http://www.mdpi.com/link,S1_Final_unconstrained_model_inputs.pdf,S2_Final_unconstrained_model_solution.pdf,S3_Final_LB_model_inputs.pdf,S4_Final_LB_model_solution.pdf,S5_Nutrients_infection_model.pdf)  
591 S1\_Final\_unconstrained\_model\_inputs.pdf,S2\_Final\_unconstrained\_model\_solution.pdf,  
592 S3\_Final\_LB\_model\_inputs.pdf, S4\_Final\_LB\_model\_solution.pdf, S5\_Nutrients\_infection\_model.pdf

593 **Acknowledgments:** This project was supported by the Defense Threat Reduction Agency (JSTO-CBD Proposal  
594 # CBCALL12-IS1-1-0283).

595 **Conflicts of Interest:** The author declares no conflict of interest. The founding sponsors had no role in the design  
596 of the study; in the collection, analyses, or interpretation of data; in the writing of the manuscript, and in the  
597 decision to publish the results.

## 598 **References**

- 599
- 600 1. White, N.J. Melioidosis. *Lancet* **2003**, *361*, 1715-1722.
  - 601 2. Currie, B.J. Melioidosis: An important cause of pneumonia in residents of and travellers  
602 returned from endemic regions. *Eur Respir J* **2003**, *22*, 542-550.
  - 603 3. Schweizer, H.P. Mechanisms of antibiotic resistance in *Burkholderia pseudomallei*: Implications  
604 for treatment of melioidosis. *Future Microbiol.* **2012**, *7*, 1389-1399.
  - 605 4. Dance, D. Treatment and prophylaxis of melioidosis. *Int J Antimicrob Agents.* **2014**, *43*, 310-  
606 318.
  - 607 5. Mays, E.E.; Ricketts, E.A. Melioidosis: Recrudescence associated with bronchogenic  
608 carcinoma twenty-six years following initial geographic exposure. *Chest* **1975**, *68*.
  - 609 6. Thibault, F.M.; Hernandez, E.; Vidal, D.R.; Girardet, M.; Cavallo, J.D. Antibiotic susceptibility  
610 of 65 isolates of *Burkholderia pseudomallei* and *Burkholderia mallei* to 35 antimicrobial agents. *J.*  
611 *Antimicrob. Chemother.* **2004**, *54*, 1134-1138.
  - 612 7. Jenney, A.W.; Lum, G.; Fisher, D.A.; Currie, B.J. Antibiotic susceptibility of *Burkholderia*  
613 *pseudomallei* from tropical northern australia and implications for therapy of melioidosis. *Int.*  
614 *J. Antimicrob. Agents* **2001**, *17*, 109-113.
  - 615 8. Dance, D.A.; Wuthiekanun, V.; Chaowagul, W.; White, N.J. The antimicrobial susceptibility  
616 of *Pseudomonas pseudomallei*. Emergence of resistance in vitro and during treatment. *J*  
617 *Antimicrob Chemother.* **1989**, *24*, 295-309.
  - 618 9. Galperin, M.Y.; Koonin, E.V. Searching for drug targets in microbial genomes. *Curr Opin*  
619 *Biotechnol.* **1999**, *10*, 571-578.
  - 620 10. Oberhardt, M.A.; Yizhak, K.; Ruppin, E. Metabolically re-modeling the drug pipeline. *Curr*  
621 *Opin Pharmacol.* **2013**, *13*, 778-785.
  - 622 11. Silver, L.L. Challenges of antibacterial discovery. *Clin Microbiol Rev.* **2011**, *24*, 71-109.
  - 623 12. Cummings, J.E.; Kingry, L.C.; Rholl, D.A.; Schweizer, H.P.; Tonge, P.J.; Slayden, R.A. The  
624 *Burkholderia pseudomallei* enoyl-acyl carrier protein reductase fabI1 is essential for in vivo  
625 growth and is the target of a novel chemotherapeutic with efficacy. *Antimicrob Agents*  
626 *Chemother.* **2014**, *58*, 931-935.
  - 627 13. Lu, H.; Tonge, P.J. Inhibitors of fabI, an enzyme drug target in the bacterial fatty acid  
628 biosynthesis pathway. *Acc Chem Res.* **2008**, *41*, 11-20.
  - 629 14. Tong, L.; Harwood, H.J.J. Acetyl-coenzyme a carboxylases: Versatile targets for drug  
630 discovery. *J Cell Biochem* **2006**, *99*, 1478-1488.
  - 631 15. Muñoz-Elías, E.J.; McKinney, J.D. *Mycobacterium tuberculosis* isocitrate lyases 1 and 2 are  
632 jointly required for in vivo growth and virulence. *Nat Med.* **2005**, *11*, 638-644.

- 633 16. van Schaik, E.J.; Tom, M.; Woods, D.E. *Burkholderia pseudomallei* isocitrate lyase is a  
634 persistence factor in pulmonary melioidosis: Implications for the development of isocitrate  
635 lyase inhibitors as novel antimicrobials. *Infect Immun*. **2009**, *77*, 4275-4283.
- 636 17. Srilunchang, T.; Proungvitaya, T.; Wongratanacheewin, S.; Strugnell, R.; Homchampa, P.  
637 Construction and characterization of an unmarked aroc deletion mutant of *Burkholderia*  
638 *pseudomallei* strain a2. *Southeast Asian J Trop Med Public Health* **2009**, *40*, 123-130.
- 639 18. Breitbach, K.; Köhler, J.; Steinmetz, I. Induction of protective immunity against *Burkholderia*  
640 *pseudomallei* using attenuated mutants with defects in the intracellular life cycle. *Trans R Soc*  
641 *Trop Med Hyg* **2008**, *102 Suppl 1*, S89-94.
- 642 19. Pilatz, S.; Breitbach, K.; Hein, N.; Fehlhaber, B.; Schulze, J.; Brenneke, B.; Eberl, L.; Steinmetz,  
643 I. Identification of *Burkholderia pseudomallei* genes required for the intracellular life cycle and  
644 in vivo virulence. *Infect Immun* **2006**, *74*, 3576-3586.
- 645 20. Cuccui, J.; Easton, A.; Chu, K.K.; Bancroft, G.J.; Oyston, P.C.; Titball, R.W.; Wren, B.W.  
646 Development of signature-tagged mutagenesis in *Burkholderia pseudomallei* to identify genes  
647 important in survival and pathogenesis. *Infect Immun* **2007**, *75*, 1186-1195.
- 648 21. Atkins, T.; Prior, R.G.; Mack, K.; Russell, P.; Nelson, M.; Oyston, P.C.; Dougan, G.; Titball,  
649 R.W. A mutant of *Burkholderia pseudomallei*, auxotrophic in the branched chain amino acid  
650 biosynthetic pathway, is attenuated and protective in a murine model of melioidosis. *Infect*  
651 *Immun* **2002**, *70*, 5290-5294.
- 652 22. Levine, H.B.; Maurer, R.L. Immunization with an induced avirulent auxotrophic mutant of  
653 *Pseudomonas pseudomallei*. *J Immunol* **1958**, *81*, 433-438.
- 654 23. Zajdowicz, S.L.; Jones-Carson, J.; Vazquez-Torres, A.; Jobling, M.G.; Gill, R.E.; Holmes, R.K.  
655 Alanine racemase mutants of *Burkholderia pseudomallei* and *Burkholderia mallei* and use of  
656 alanine racemase as a non-antibiotic-based selectable marker. *PLoS One* **2011**, *6*, e21523.
- 657 24. Vanaporn, M.; Wand, M.; Michell, S.L.; Sarkar-Tyson, M.; Ireland, P.; Goldman, S.;  
658 Kewcharoenwong, C.; Rinchai, D.; Lertmemongkolchai, G.; Titball, R.W. Superoxide  
659 dismutase c is required for intracellular survival and virulence of *Burkholderia pseudomallei*.  
660 *Microbiology* **2011**, *157*, 2392-2400.
- 661 25. Lee, H.S.; Gu, F.; Ching, S.M.; Lam, Y.; Chua, K.L. Cdpa is a *Burkholderia pseudomallei* cyclic  
662 di-gmp phosphodiesterase involved in autoaggregation, flagellum synthesis, motility,  
663 biofilm formation, cell invasion, and cytotoxicity. *Infect Immun* **2010**, *78*, 1832-1840.
- 664 26. McPhillie, M.J.; Cain, R.M.; Narramore, S.; Fishwick, C.W.; Simmons, K.J. Computational  
665 methods to identify new antibacterial targets. *Chem Biol Drug Des.* **2015**, *85*, 22-29.
- 666 27. Chung, B.K.; Dick, T.; Lee, D.Y. In silico analyses for the discovery of tuberculosis drug  
667 targets. *J Antimicrob Chemother.* **2013**, *68*, 2701-2709.
- 668 28. Mobegi, F.M.; van Hijum, S.A.; Burghout, P.; Bootsma, H.J.; de Vries, S.P.; van der Gaast-de  
669 Jongh, C.E.; Simonetti, E.; Langereis, J.D.; Hermans, P.W.; de Jonge, M.I., *et al.* From microbial  
670 gene essentiality to novel antimicrobial drug targets. *BMC Genomics* **2014**, *15*, 958.
- 671 29. Hamilton, J.J.; Reed, J.L. Software platforms to facilitate reconstructing genome-scale  
672 metabolic networks. *Environ Microbiol.* **2014**, *16*, 49-59.
- 673 30. Thiele, I.; Palsson, B.Ø. A protocol for generating a high-quality genome-scale metabolic  
674 reconstruction. *Nat. Protoc.* **2010**, *5*, 93-121.

- 675 31. Yeh, I.; Hanekamp, T.; Tsoka, S.; Karp, P.D.; Altman, R.B. Computational analysis of  
676 *Plasmodium falciparum* metabolism: Organizing genomic information to facilitate drug  
677 discovery. *Genome Res* **2004**, *14*, 917-924.
- 678 32. Duffield, M.; Cooper, I.; McAlister, E.; Bayliss, M.; Ford, D.; Oyston, P. Predicting conserved  
679 essential genes in bacteria: In silico identification of putative drug targets. *Mol Biosyst.* **2010**,  
680 *6*, 2482-2489.
- 681 33. Sakharkar, K.R.; Sakharkar, M.K.; Chow, V.T. A novel genomics approach for the  
682 identification of drug targets in pathogens, with special reference to *Pseudomonas aeruginosa*.  
683 *In Silico Biol.* **2004**, *4*, 355-360.
- 684 34. Singh, S.; Malik, B.K.; Sharma, D.K. Metabolic pathway analysis of *s. Pneumoniae*: An in silico  
685 approach towards drug-design. *J Bioinform Comput Biol* **2007**, *5*, 135-153.
- 686 35. Karp, P.D.; Paley, S.; Romero, P. The pathway tools software. *Bioinformatics* **2002**, *18 Suppl 1*,  
687 S225-S232.
- 688 36. Aziz, R.K.; Bartels, D.; Best, A.A.; DeJongh, M.; Disz, T.; Edwards, R.A.; Formsma, K.; Gerdes,  
689 S.; Glass, E.M.; Kubal, M., *et al.* The rast server: Rapid annotations using subsystems  
690 technology. *BMC Genomics* **2008**, *9*, 75.
- 691 37. Challacombe, J.F.; Stubben, C.J.; Klimko, C.P.; Welkos, S.L.; Kern, S.J.; Bozue, J.A.; Worsham,  
692 P.L.; Cote, C.K.; Wolfe, D.N. Interrogation of the *Burkholderia pseudomallei* genome to address  
693 differential virulence among isolates. *PLoS One* **2014**, *9*, e115951.
- 694 38. Karp, P.D.; Latendresse, M.; Caspi, R. The pathway tools pathway prediction algorithm.  
695 *Stand Genomic Sci* **2011**, *5*, 424-429.
- 696 39. Latendresse, M.; Krummenacker, M.; Trupp, M.; Karp, P.D. Construction and completion of  
697 flux balance models from pathway databases. *Bioinformatics* **2102**, *28*, 388-396.
- 698 40. Fraser, D.; Powell, R.E. The kinetics of trypsin digestion. *J Biol Chem.* **1950**, *187*, 803-820.
- 699 41. Bertani, G. Studies on lysogenesis. I. The mode of phage liberation by lysogenic *Escherichia*  
700 *coli*. *J Bacteriol.* **1951**, *62*, 293-300.
- 701 42. Grant, C.L.; Pramer, D. Minor element composition of yeast extract. *J Bacteriol.* **1962**, *84*, 869-  
702 870.
- 703 43. Oh, Y.K.; Palsson, B.O.; Park, S.M.; Schilling, C.H.; Mahadevan, R. Genome-scale  
704 reconstruction of metabolic network in *Bacillus subtilis* based on high-throughput  
705 phenotyping and gene essentiality data. *J Biol Chem.* **2007**, *282*, 28791-28799.
- 706 44. Zhang, R.; Lin, Y. Deg 5.0, a database of essential genes in both prokaryotes and eukaryotes.  
707 *Nucleic Acids Res.* **2009**, *37(Database issue)*, D455-458.
- 708 45. Wishart, D.S.; Knox, C.; Guo, A.C.; Cheng, D.; Shrivastava, S.; Tzur, D.; Gautam, B.;  
709 Hassanali, M. Drugbank: A knowledgebase for drugs, drug actions and drug targets. *Nucleic*  
710 *Acids Res.* **2008**, *36(Database issue)*, D901-906.
- 711 46. Shannon, P.; Markiel, A.; Ozier, O.; Baliga, N.S.; Wang, J.T.; Ramage, D.; Amin, N.;  
712 Schwikowski, B.; Ideker, T. Cytoscape: A software environment for integrated models of  
713 biomolecular interaction networks. *Genome Res* **2003**, *13*, 2498-2504.
- 714 47. Price, C.T.; Richards, A.M.; Abu Kwaik, Y. Nutrient generation and retrieval from the host  
715 cell cytosol by intra-vacuolar *Legionella pneumophila*. *Front Cell Infect Microbiol* **2014**, *4*, 111.
- 716 48. Price, C.T.; Abu Kwaik, Y. Amoebae and mammals deliver protein-rich atkins diet meals to  
717 *Legionella* cells. *Microbe* **2012**, *7*, 506-513.

- 718 49. Gao, L.Y.; Harb, O.S.; Abu Kwaik, Y. Utilization of similar mechanisms by *Legionella*  
719 *pneumophila* to parasitize two evolutionarily distant host cells, mammalian macrophages and  
720 protozoa. *Infect. Immun.* **1997**, *65*, 4738-4746.
- 721 50. Eylert, E.; Herrmann, V.; Jules, M.; Gillmaier, N.; Lautner, M.; Buchrieser, C.; Eisenreich, W.;  
722 Heuner, K. Isotopologue profiling of *Legionella pneumophila*: Role of serine and glucose as  
723 carbon substrates. *J Biol Chem.* **2010**, *285*, 22232-22243.
- 724 51. DeShazer, D. Genomic diversity of *Burkholderia pseudomallei* clinical isolates: Subtractive  
725 hybridization reveals a *Burkholderia mallei*-specific prophage in *B. pseudomallei* 1026b. *J.*  
726 *Bacteriol.* **2004**, *186*, 3938-3950.
- 727 52. Ooi, W.F.; Ong, C.; Nandi, T.; Kreisberg, J.F.; Chua, H.H.; Sun, G.; Chen, Y.; Mueller, C.;  
728 Conejero, L.; Eshaghi, M., *et al.* The condition-dependent transcriptional landscape of  
729 *Burkholderia pseudomallei*. *PLoS Genet.* **2013**, *9*, e1003795.
- 730 53. Chieng, S.; Carreto, L.; Nathan, S. *Burkholderia pseudomallei* transcriptional adaptation in  
731 macrophages. *BMC Genomics* **2012**, *13*, 328.
- 732 54. Eriksson, S.; Lucchini, S.; Thompson, A.; Rhen, M.; Hinton, J.C. Unravelling the biology of  
733 macrophage infection by gene expression profiling of intracellular *Salmonella enterica*. *Mol*  
734 *Microbiol* **2003**, *47*, 103-118.
- 735 55. Zdziarski, J.; Brzuszkiewicz, E.; Wullt, B.; Liesegang, H.; Biran, D.; Voigt, B.; Grönberg-  
736 Hernandez, J.; Ragnarsdottir, B.; Hecker, M.; Ron, E.Z., *et al.* Host imprints on bacterial  
737 genomes--rapid, divergent evolution in individual patients. *PLoS Pathog.* **2010**, *6*, e1001078.
- 738 56. Reniere, M.L.; Whiteley, A.T.; Hamilton, K.L.; John, S.M.; Lauer, P.; Brennan, R.G.; Portnoy,  
739 D.A. Glutathione activates virulence gene expression of an intracellular pathogen. *Nature*  
740 **2015**, *517*, 70-31.
- 741 57. Eylert, E.; Schär, J.; Mertins, S.; Stoll, R.; Bacher, A.; Goebel, W.; Eisenreich, W. Carbon  
742 metabolism of *Listeria monocytogenes* growing inside macrophages. *Mol Microbiol.* **2008**, *69*,  
743 1008-1017.
- 744 58. Chico-Calero, I.; Suárez, M.; González-Zorn, B.; Scotti, M.; Slaghuis, J.; Goebel, W.; Vázquez-  
745 Boland, J.A.; Consortium, E.L.G. Hpt, a bacterial homolog of the microsomal glucose- 6-  
746 phosphate translocase, mediates rapid intracellular proliferation in *Listeria*. *Proc Natl Acad Sci*  
747 *U S A* **2002**, *99*, 431-436.
- 748 59. Eisenreich, W.; Dandekar, T.; Heesemann, J.; Goebel, W. Carbon metabolism of intracellular  
749 bacterial pathogens and possible links to virulence. *Nat Rev Microbiol* **2010**, *8*, 401-412.
- 750 60. Fuchs, T.M.; Eisenreich, W.; Heesemann, J.; Goebel, W. Metabolic adaptation of human  
751 pathogenic and related nonpathogenic bacteria to extra- and intracellular habitats. *FEMS*  
752 *Microbiol Rev.* **2012**, *36*, 435-462.
- 753 61. Gore, A.L.; Payne, S.M. *Csra* and *cra* influence *Shigella flexneri* pathogenesis. *Infect Immun.*  
754 **2010**, *78*, 4674-4682.
- 755 62. Litwin, C.M.; Calderwood, S.B. Role of iron in regulation of virulence genes. *Clin Microbiol*  
756 *Rev.* **1993**, *6*, 137-149.
- 757 63. Mellies, J.L.; Barron, A.M.; Carmona, A.M. Enteropathogenic and enterohemorrhagic  
758 *Escherichia coli* virulence gene regulation. *Infect Immun* **2007**, *75*, 4199-4210.



- 759 64. Njoroge, J.W.; Nguyen, Y.; Curtis, M.M.; Moreira, C.G.; Sperandio, V. Virulence meets  
760 metabolism: Cra and kdpe gene regulation in enterohemorrhagic *Escherichia coli*. *MBio* **2012**,  
761 3, e00280-00212.
- 762 65. Porcheron, G.; Dozois, C.M. Interplay between iron homeostasis and virulence: Fur and ryhb  
763 as major regulators of bacterial pathogenicity. *Vet Microbiol* **2015**, *179*, 2-14.
- 764 66. Ray, K.; Marteyn, B.; Sansonetti, P.J.; Tang, C.M. Life on the inside: The intracellular lifestyle  
765 of cytosolic bacteria. *Nat Rev Microbiol* **2009**, *7*, 333-340.
- 766 67. Rohmer, L.; Hocquet, D.; Miller, S.I. Are pathogenic bacteria just looking for food?  
767 Metabolism and microbial pathogenesis. *Trends Microbiol.* **2011**, *19*, 341-348.
- 768 68. Gorke, B.; Stulke, J. Carbon catabolite repression in bacteria: Many ways to make the most  
769 out of nutrients. *Nat Rev Microbiol* **2008**, *6*, 613-624.
- 770 69. Barel, M.; Charbit, A. *Francisella tularensis* intracellular survival: To eat or to die. *Microbes*  
771 *Infect* **2013**, pii, S1286-4579(1213)00206-00202.
- 772 70. Kwaik, Y.A. Nutrition-based evolution of intracellular pathogens. *Environmental Microbiology*  
773 *Reports* **2015**, *7*, 2-3.
- 774 71. Kwaik, Y.A.; Bumann, D. Microbial quest for food in vivo: 'Nutritional virulence' as an  
775 emerging paradigm. *Cell Microbiol.* **2013**, *15*, 882-890.
- 776 72. Meibom, K.L.; Charbit, A. *Francisella tularensis* metabolism and its relation to virulence. *Front*  
777 *Microbiol.* **2010**, *1*, 140.
- 778 73. Olive, A.J.; Sassetti, C.M. Metabolic crosstalk between host and pathogen: Sensing, adapting  
779 and competing. *Nature Reviews Microbiology* **2016**, *14*, 221-234.
- 780 74. Santic, M.; Kwaik, Y.A. Nutritional virulence of *Francisella tularensis*. *Front Cell Infect Microbiol*  
781 **2013**, *3*, 112.
- 782 75. Muñoz-Elías, E.J.; McKinney, J.D. Carbon metabolism of intracellular bacteria. *Cell Microbiol.*  
783 **2006**, *8*, 10-22.
- 784 76. Brown, S.A.; Palmer, K.L.; Whiteley, M. Revisiting the host as a growth medium. *Nat Rev*  
785 *Microbiol.* **2008**, *6*, 657-666.
- 786 77. Fuhrer, T.; Fischer, E.; Sauer, U. Experimental identification and quantification of glucose  
787 metabolism in seven bacterial species. *J Bacteriol.* **2005**, *187*, 1581-1590.
- 788 78. Renesto, P.; Ogata, H.; Audic, S.; Claverie, J.M.; Raoult, D. Some lessons from *Rickettsia*  
789 genomics. *FEMS Microbiol Rev* **2005**, *29*, 99-117.
- 790 79. Propst, K.L.; Mima, T.; Choi, K.H.; Dow, S.W.; Schweizer, H.P. A *Burkholderia pseudomallei*  
791 *deltapurm* mutant is avirulent in immunocompetent and immunodeficient animals:  
792 Candidate strain for exclusion from select-agent lists. *Infect Immun* **2010**, *78*, 3136-3143.
- 793 80. Norris, M.H.; Propst, K.L.; Kang, Y.; Dow, S.W.; Schweizer, H.P.; Hoang, T.T. The  
794 *Burkholderia pseudomallei* *dasd* mutant exhibits attenuated intracellular infectivity and imparts  
795 protection against acute inhalation melioidosis in mice. *Infect Immun* **2011**, *79*, 4010-4018.
- 796 81. Rodrigues, F.; Sarkar-Tyson, M.; Harding, S.V.; Sim, S.H.; Chua, H.H.; Lin, C.H.; Han, X.;  
797 Karuturi, R.K.; Sung, K.; Yu, K., *et al.* Global map of growth-regulated gene expression in  
798 *Burkholderia pseudomallei*, the causative agent of melioidosis. *J Bacteriol* **2006**, *188*, 8178-8188.
- 799 82. Korbsrisate, S.; Tomaras, A.P.; Damnin, S.; Ckumdee, J.; Srinon, V.; Lengwehasatit, I.; Vasil,  
800 M.L.; Suparak, S. Characterization of two distinct phospholipase c enzymes from *Burkholderia*  
801 *pseudomallei*. *Microbiology* **2007**, *153*, 1907-1915.

- 802 83. Ireland, P.M.; McMahon, R.M.; Marshall, L.E.; Halili, M.; Furlong, E.; Tay, S.; Martin, J.L.;  
803 Sarkar-Tyson, M. Disarming *Burkholderia pseudomallei*: Structural and functional  
804 characterization of a disulfide oxidoreductase (DsbA) required for virulence in vivo. *Antioxid*  
805 *Redox Signal* **2014**, *20*, 606-617.
- 806 84. Drabner, B.; Guzmán, C.A. Elicitation of predictable immune responses by using live  
807 bacterial vectors. *Biomol Eng* **2001**, *17*, 75-82.
- 808 85. Peacock, S.J.; Limmathurotsakul, D.; Lubell, Y.; Koh, G.C.; White, L.J.; Day, N.P.; Titball, R.W.  
809 Melioidosis vaccines: A systematic review and appraisal of the potential to exploit biodefense  
810 vaccines for public health purposes. *PLoS Negl Trop Dis* **2012**, *6*, e1488.
- 811 86. Sim SH, Y.Y., Lin CH, Karuturi RKM, Wuthiekanun V, Tuanyok A. The core and accessory  
812 genomes of *Burkholderia pseudomallei*: Implications for human melioidosis. *PLoS Pathog* **2008**,  
813 *4*, e1000178.
- 814 87. Sahl, J.W.; Vazquez, A.J.; Hall, C.M.; Busch, J.D.; Tuanyok, A.; Mayo, M.; Schupp, J.M.;  
815 Lummis, M.; Pearson, T.; Shippy, K., *et al.* The effects of signal erosion and core genome  
816 reduction on the identification of diagnostic markers. *mBio* **2016**, *7*, e00846-00816.
- 817 88. Butt, A.M.; Tahir, S.; Nasrullah, I.; Idrees, M.; Lu, J.; Tong, Y. *Mycoplasma genitalium*: A  
818 comparative genomics study of metabolic pathways for the identification of drug and vaccine  
819 targets. *Infect Genet Evol* **2012**, *12*, 53-62.
- 820 89. Butt, A.M.; Nasrullah, I.; Tahir, S.; Tong, Y. Comparative genomics analysis of *Mycobacterium*  
821 *ulcerans* for the identification of putative essential genes and therapeutic candidates. *PLoS*  
822 *One* **2012**, *7*, e43080.
- 823 90. Anishetty, S.; Pulimi, M.; Pennathur, G. Potential drug targets in *Mycobacterium tuberculosis*  
824 through metabolic pathway analysis. *Comput Biol Chem* **2005**, *29*, 368-378.
- 825 91. Yadav, P.K.; Singh, G.; Singh, S.; Gautam, B.; Saad, E.I. Potential therapeutic drug target  
826 identification in community acquired-methicillin resistant *Staphylococcus aureus* (ca-mrsa)  
827 using computational analysis. *Bioinformatics* **2012**, *8*, 664-672.
- 828 92. Uddin, R.; Saeed, K. Identification and characterization of potential drug targets by  
829 subtractive genome analyses of methicillin resistant *Staphylococcus aureus*. *Comput Biol Chem*  
830 **2014**, *48*, 55-63.
- 831 93. Uddin, R.; Saeed, K.; Khan, W.; Azam, S.S.; Wadood, A. Metabolic pathway analysis  
832 approach: Identification of novel therapeutic target against methicillin resistant  
833 *Staphylococcus aureus*. *Gene* **2015**, *556*, 213-226.
- 834 94. Barh, D.; Tiwari, S.; Jain, N.; Ali, A.; Santos, A.R.; Misra, A.N.; Azevedo, V.; Kumar, A. In  
835 silico subtractive genomics for target identification in human bacterial pathogens. *Drug Dev.*  
836 *Res.* **2011**, *72*, 162-177.
- 837 95. Ahn, Y.Y.; Lee, D.S.; Burd, H.; Blank, W.; Kapatral, V. Metabolic network analysis-based  
838 identification of antimicrobial drug targets in category a bioterrorism agents. *PLoS One* **2014**,  
839 *9*, e85195.
- 840 96. Damte, D.; Suh, J.W.; Lee, S.J.; Yohannes, S.B.; Hossain, M.A.; Park, S.C. Putative drug and  
841 vaccine target protein identification using comparative genomic analysis of kegg annotated  
842 metabolic pathways of *Mycoplasma hyopneumoniae*. *Genomics* **2013**, *102*, 47-56.

- 843 97. Fang, K.; Zhao, H.; Sun, C.; Lam, C.M.; Chang, S.; Zhang, K.; Panda, G.; Godinho, M.; Martins  
844 dos Santos, V.A.; Wang, J. Exploring the metabolic network of the epidemic pathogen  
845 *Burkholderia cenocepacia* j2315 via genome-scale reconstruction. *BMC Syst Biol.* **2011**, *5*, 83.
- 846 98. Lee, D.S.; Burd, H.; Liu, J.; Almaas, E.; Wiest, O.; Barabási, A.L.; Oltvai, Z.N.; Kapatral, V.  
847 Comparative genome-scale metabolic reconstruction and flux balance analysis of multiple  
848 *Staphylococcus aureus* genomes identify novel antimicrobial drug targets. *J Bacteriol.* **2009**, *191*,  
849 4015-4024.
- 850 99. Rahman, S.A.; Schomburg, D. Observing local and global properties of metabolic pathways:  
851 'Load points' and 'choke points' in the metabolic networks. *Bioinformatics* **2006**, *22*, 1767-1774.
- 852 100. Baths, V.; Roy, U.; Singh, T. Disruption of cell wall fatty acid biosynthesis in *Mycobacterium*  
853 *tuberculosis* using a graph theoretic approach. *Theor Biol Med Model* **2011**, *8*, 5.
- 854 101. Chaudhury, S.; Abdulhameed, M.D.; Singh, N.; Tawa, G.J.; D'haeseleer, P.M.; Zemla, A.T.;  
855 Navid, A.; Zhou, C.E.; Franklin, M.C.; Cheung, J., *et al.* Rapid countermeasure discovery  
856 against *Francisella tularensis* based on a metabolic network reconstruction. *PLoS One* **2013**, *8*,  
857 e63369.
- 858 102. Heinemann, M.; Kümmel, A.; Ruinatscha, R.; Panke, S. In silico genome-scale reconstruction  
859 and validation of the *Staphylococcus aureus* metabolic network. *Biotechnol Bioeng* **2005**, *92*, 850-  
860 864.
- 861 103. Herrgård, M.J.; Fong, S.S.; Palsson, B.Ø. Identification of genome-scale metabolic network  
862 models using experimentally measured flux profiles. *PLoS Comput Biol* **2006**, *2*, e72.
- 863 104. Kim, H.U.; Kim, S.Y.; Jeong, H.; Kim, T.Y.; Kim, J.J.; Choy, H.E.; Yi, K.Y.; Rhee, J.H.; Lee, S.Y.  
864 Integrative genome-scale metabolic analysis of *Vibrio vulnificus* for drug targeting and  
865 discovery. *Mol Syst Biol* **2011**, *7*, 460.
- 866 105. Raghunathan, A.; Shin, S.; Daefler, S. Systems approach to investigating host-pathogen  
867 interactions in infections with the biothreat agent *Francisella*. Constraints-based model of  
868 *Francisella tularensis*. *BMC Syst Biol* **2010**, *4*, 118.
- 869 106. Chavali, A.K.; D'Auria, K.M.; Hewlett, E.L.; Pearson, R.D.; Papin, J.A. A metabolic network  
870 approach for the identification and prioritization of antimicrobial drug targets. *Trends*  
871 *Microbiol.* **2012**, *20*, 113-123.
- 872 107. Fatumo, S.; Plaimas, K.; Mallm, J.P.; Schramm, G.; Adebiyi, E.; Oswald, M.; Eils, R.; König, R.  
873 Estimating novel potential drug targets of *Plasmodium falciparum* by analysing the metabolic  
874 network of knock-out strains *in silico*. *Infect Genet Evol* **2009**, *9*, 351-358.
- 875 108. Guimerà, R.; Sales-Pardo, M.; Amaral, L.A. A network-based method for target selection in  
876 metabolic networks. *Bioinformatics* **2007**, *23*, 1616-1622.
- 877 109. Chavali, A.K.; Whittemore, J.D.; Eddy, J.A.; Williams, K.T.; Papin, J.A. Systems analysis of  
878 metabolism in the pathogenic trypanosomatid *Leishmania major*. *Mol Syst Biol* **2008**, *4*, 177.
- 879 110. Perumal, D.; Lim, C.S.; Sakharkar, M.K. A comparative study of metabolic network topology  
880 between a pathogenic and a non-pathogenic bacterium for potential drug target  
881 identification. *Summit on Translat Bioinforma.* **2009**, *2009*, 100-104.
- 882 111. Taylor, C.M.; Wang, Q.; Rosa, B.A.; Huang, S.C.; Powell, K.; Schedl, T.; Pearce, E.J.;  
883 Abubucker, S.; Mitreva, M. Discovery of anthelmintic drug targets and drugs using  
884 chokepoints in nematode metabolic pathways. *PLoS Pathog* **2013**, *9*, e1003505.

- 885 112. Ioerger, T.R.; O'Malley, T.; Liao, R.; Guinn, K.M.; Hickey, M.J.; Mohaideen, N.; Murphy, K.C.;  
886 Boshoff, H.I.; Mizrahi, V.; Rubin, E.J., *et al.* Identification of new drug targets and resistance  
887 mechanisms in *Mycobacterium tuberculosis*. *PLoS One* **2013**, *8*, e75245.
- 888 113. Orelle, C.; Szal, T.; Klepacki, D.; Shaw, K.J.; Vázquez-Laslop, N.; Mankin, A.S. Identifying the  
889 targets of aminoacyl-trna synthetase inhibitors by primer extension inhibition. *Nucleic Acids*  
890 *Res* **2013**, *41*, e144.
- 891 114. Novoa, E.M.; Camacho, N.; Tor, A.; Wilkinson, B.; Moss, S.; Marín-García, P.; Azcárate, I.G.;  
892 Bautista, J.M.; Mirando, A.C.; Francklyn, C.S., *et al.* Analogs of natural aminoacyl-trna  
893 synthetase inhibitors clear malaria in vivo. *Proc Natl Acad Sci U S A*. **2014**, *111*, E5508-5517.
- 894 115. Schimmel, P.; Tao, J.; Hill, J. Aminoacyl trna synthetases as targets for new anti-infectives.  
895 *FASEB J* **1998**, *12*, 1599-1609.
- 896 116. Kim, S.; Lee, S.W.; Choi, E.C.; Choi, S.Y. Aminoacyl-trna synthetases and their inhibitors as a  
897 novel family of antibiotics. *Appl Microbiol Biotechnol*. **2003**, *61*, 278-288.
- 898 117. Hurdle, J.G.; O'Neill, A.J.; Chopra, I. Prospects for aminoacyl-trna synthetase inhibitors as  
899 new antimicrobial agents. *Antimicrob Agents Chemother*. **2005**, *49*, 4821-4833.
- 900 118. Thomas, C.M.; Hothersall, J.; Willis, C.L.; Simpson, T.J. Resistance to and synthesis of the  
901 antibiotic mupirocin. *Nat Rev Microbiol* **2010**, *8*, 281-289.
- 902 119. Koh, C.Y.; Siddaramaiah, L.K.; Ranade, R.M.; Nguyen, J.; Jian, T.; Zhang, Z.; Gillespie, J.R.;  
903 Buckner, F.S.; Verlinde, C.L.; Fan, E., *et al.* A binding hotspot in *Trypanosoma cruzi* histidyl-  
904 trna synthetase revealed by fragment-based crystallographic cocktail screens. *Acta Crystallogr*  
905 *D Biol Crystallogr* **2015**, *71*, 1684-1698.
- 906 120. Biela, I.; Tidten-Luksch, N.; Immekus, F.; Glinca, S.; Nguyen, T.X.; Gerber, H.D.; Heine, A.;  
907 Klebe, G.; Reuter, K. Investigation of specificity determinants in bacterial trna-guanine  
908 transglycosylase reveals queuine, the substrate of its eucaryotic counterpart, as inhibitor.  
909 *PLoS One* **2013**, *8*, e64240.
- 910 121. Grädler, U.; Gerber, H.D.; Goodenough-Lashua, D.M.; Garcia, G.A.; Ficner, R.; Reuter, K.;  
911 Stubbs, M.T.; Klebe, G. A new target for shigellosis: Rational design and crystallographic  
912 studies of inhibitors of trna-guanine transglycosylase. *J Mol Biol* **2001**, *306*, 455-467.
- 913 122. Pohlhaus, J.R.; Long, D.T.; O'Reilly, E.; Kreuzer, K.N. The epsilon subunit of DNA  
914 polymerase iii is involved in the nalidixic acid-induced sos response in *Escherichia coli*. *J*  
915 *Bacteriol* **2008**, *190*, 5239-5247.
- 916 123. Cirz, R.T.; Chin, J.K.; Andes, D.R.; de Crécy-Lagard, V.; Craig, W.A.; Romesberg, F.E.  
917 Inhibition of mutation and combating the evolution of antibiotic resistance. *PLoS Biology*  
918 **2005**, *3*, e176.
- 919 124. Nautiyal, A.; Patil, K.N.; Muniyappa, K. Suramin is a potent and selective inhibitor of  
920 *Mycobacterium tuberculosis* reca protein and the sos response: RecA as a potential target for  
921 antibacterial drug discovery. *J Antimicrob Chemother* **2014**, *69*, 1834-1843.
- 922 125. Culyba, M.J.; Mo, C.Y.; Kohli, R.M. Targets for combating the evolution of acquired antibiotic  
923 resistance. *Biochemistry* **2015**, *54*, 3573-3582.
- 924 126. Tye, B.-K.; Lehman, I.R. Excision repair of uracil incorporated in DNA as a result of a defect  
925 in dutpase. *J. Mol. Biol.* **1977**, *117*, 293-306.
- 926 127. Nguyen, C.; Kasinathan, G.; Leal-Cortijo, I.; Musso-Buendia, A.; Kaiser, M.; Brun, R.; Ruiz-  
927 Pérez, L.M.; Johansson, N.G.; González-Pacanowska, D.; Gilbert, I.H. Deoxyuridine

- 928 triphosphate nucleotidohydrolase as a potential antiparasitic drug target. *J Med Chem* **2005**,  
929 *48*, 5942-5954.
- 930 128. Hampton, S.E.; Baragaña, B.; Schipani, A.; Bosch-Navarrete, C.; Musso-Buendía, J.A.; Recio,  
931 E.; Kaiser, M.; Whittingham, J.L.; Roberts, S.M.; Shevtsov, M., *et al.* Design, synthesis, and  
932 evaluation of 5'-diphenyl nucleoside analogues as inhibitors of the *Plasmodium falciparum*  
933 dntpase. *ChemMedChem* **2011**, *6*, 1816-1831.
- 934 129. Kepple, K.V.; Boldt, J.L.; Segall, A.M. Holliday junction-binding peptides inhibit distinct  
935 junction-processing enzymes. *Proc Natl Acad Sci U S A* **2005**, *102*, 6867-6872.
- 936 130. Sechman, E.V.; Kline, K.A.; Seifert, S. Loss of both holliday junction processing pathways is  
937 synthetically lethal in the presence of gonococcal pilin antigenic variation. *Mol Microbiol* **2006**,  
938 *61*, 185-193.
- 939 131. Suksangpleng, T.; Leartsakulpanich, U.; Moonsom, S.; Siribal, S.; Boonyuen, U.; Wright, G.E.;  
940 Chavalitshewinkoon-Petmitr, P. Molecular characterization of *Plasmodium falciparum* uracil-  
941 DNA glycosylase and its potential as a new anti-malarial drug target. *Malar J* **2014**, *13*, 149.
- 942 132. Venkatesh, J.; Kumar, P.; Krishna, P.S.; Manjunath, R.; Varshney, U. Importance of uracil  
943 DNA glycosylase in *Pseudomonas aeruginosa* and *Mycobacterium smegmatis*, g+c-rich bacteria,  
944 in mutation prevention, tolerance to acidified nitrite, and endurance in mouse macrophages.  
945 *J Biol Chem.* **2003**, *278*, 24350-24358.
- 946 133. Landini, P.; Corti, E.; Goldstein, B.P.; Denaro, M. Mechanism of action of purpuromycin.  
947 *Biochem J* **1992**, *284*, 47-52.
- 948 134. Nishio, A.; Uyeki, E.M. Cellular uptake and inhibition of DNA synthesis by  
949 dihydroxyanthraquinone and two analogues. *Cancer Res* **1983**, *43*, 1951-1956.
- 950 135. Kelly, T.M.; Stachula, S.A.; Raetz, C.R.; Anderson, M.S. The firA gene of *Escherichia coli*  
951 encodes udp-3-o-(r-3-hydroxymyristoyl)-glucosamine n-acyltransferase. The third step of  
952 endotoxin biosynthesis. *J Biol Chem.* **1993**, *268*, 19866-19874.
- 953 136. Raetz, C.R.; Whitfield, C. Lipopolysaccharide endotoxins. *Annu Rev Biochem* **2002**, *71*, 635-  
954 700.
- 955 137. Emiola, A.; George, J.; Andrews, S.S. A complete pathway model for lipid a biosynthesis in  
956 *Escherichia coli*. *PLoS One* **2015**, *10*, e0121216.
- 957 138. Farha, M.A.; Czarny, T.L.; Myers, C.L.; Worrall, L.J.; French, S.; Conrady, D.G.; Wang, Y.;  
958 Oldfield, E.; Strynadka, N.C.; Brown, E.D. Antagonism screen for inhibitors of bacterial cell  
959 wall biogenesis uncovers an inhibitor of undecaprenyl diphosphate synthase. *Proc Natl Acad*  
960 *Sci U S A* **2015**, *112*, 11048-11053.
- 961 139. Dodbele, S.; Martinez, C.D.; Troutman, J.M. Species differences in alternative substrate  
962 utilization by the antibacterial target undecaprenyl pyrophosphate synthase. *Biochemistry*  
963 **2014**, *53*, 5042-5050.
- 964 140. Kuo, C.J.; Guo, R.T.; Lu, I.L.; Liu, H.G.; Wu, S.Y.; Ko, T.P.; Wang, A.H.; Liang, P.H. Structure-  
965 based inhibitors exhibit differential activities against *Helicobacter pylori* and *Escherichia coli*  
966 undecaprenyl pyrophosphate synthases. *J Biomed Biotechnol* **2008**, *2008*, 841312.
- 967 141. Zhu, W.; Zhang, Y.; Sinko, W.; Hensler, M.E.; Olson, J.; Molohon, K.J.; Lindert, S.; Cao, R.; Li,  
968 K.; Wang, K., *et al.* Antibacterial drug leads targeting isoprenoid biosynthesis. *Proc Natl Acad*  
969 *Sci U S A* **2013**, *110*, 123-128.

- 970 142. Sinko, W.; Wang, Y.; Zhu, W.; Zhang, Y.; Feixas, F.; Cox, C.L.; Mitchell, D.A.; Oldfield, E.;  
971 McCammon, J. Undecaprenyl diphosphate synthase inhibitors: Antibacterial drug leads. *J*  
972 *Med Chem* **2014**, *57*, 5693-5701.
- 973 143. Walker, S.; Chen, L.; Hu, Y.; Rew, Y.; Shin, D.; Boger, D.L. Chemistry and biology of  
974 ramoplanin: A lipoglycopeptide with potent antibiotic activity. *Chem Rev* **2005**, *105*, 449-  
975 476.
- 976 144. Helm, J.S.; Hu, Y.; Chen, L.; Gross, B.; Walker, S. Identification of active-site inhibitors of  
977 murg using a generalizable, high-throughput glycosyltransferase screen. *J Am Chem Soc* **2003**,  
978 *125*, 11168-11169.
- 979 145. Mann, P.A.; Müller, A.; Xiao, L.; Pereira, P.M.; Yang, C.; Ho Lee, S.; Wang, H.; Trzeciak, J.;  
980 Schneeweis, J.; Dos Santos, M.M., *et al.* Murgocil is a highly bioactive staphylococcal-specific  
981 inhibitor of the peptidoglycan glycosyltransferase enzyme murg. *ACS Chem Biol* **2013**, *8*,  
982 2442-2451.
- 983 146. Olesen, S.H.; Ingles, D.J.; Yang, Y.; Schönbrunn, E. Differential antibacterial properties of the  
984 mura inhibitors terreic acid and fosfomycin. *J Basic Microbiol* **2014**, *54*, 322-326.
- 985 147. Bensen, D.C.; Rodriguez, S.; Nix, J.; Cunningham, M.L.; Tari, L.W. Structure of mura (udp-n-  
986 acetylglucosamine enolpyruvyl transferase) from *Vibrio fischeri* in complex with substrate  
987 udp-n-acetylglucosamine and the drug fosfomycin. *Acta Crystallogr Sect F Struct Biol Cryst*  
988 *Commun* **2012**, *68*, 382-385.
- 989 148. Gautam, A.; Rishi, P.; Tewari, R. Udp-n-acetylglucosamine enolpyruvyl transferase as a  
990 potential target for antibacterial chemotherapy: Recent developments. *Appl Microbiol*  
991 *Biotechnol.* **2011**, *92*, 211-212.
- 992 149. Han, H.; Yang, Y.; Olesen, S.H.; Becker, A.; Betzi, S.; Schönbrunn, E. The fungal product  
993 terreic acid is a covalent inhibitor of the bacterial cell wall biosynthetic enzyme udp-n-  
994 acetylglucosamine 1-carboxyvinyltransferase (mura) *Biochemistry* **2010**, *49*, 4276-4282.
- 995 150. Bachelier, A.; Mayer, R.; Klein, C.D. Sesquiterpene lactones are potent and irreversible  
996 inhibitors of the antibacterial target enzyme mura. *Bioorg Med Chem Lett* **2006**, *16*, 5605-5609.
- 997 151. Eschenburg, S.; Priestman, M.A.; Abdul-Latif, F.A.; Delachaume, C.; Fassy, F.; Schönbrunn,  
998 E. A novel inhibitor that suspends the induced fit mechanism of udp-n-acetylglucosamine  
999 enolpyruvyl transferase (mura). *J Biol Chem.* **2005**, *280*, 14070-14075.
- 1000 152. Smithen, D.A.; Forget, S.M.; McCormick, N.E.; Syvitski, R.T.; Jakeman, D.L. Polyphosphate-  
1001 containing bisubstrate analogues as inhibitors of a bacterial cell wall thymidyltransferase.  
1002 *Org Biomol Chem* **2015**, *13*, 3347-3350.
- 1003 153. Blankenfeldt, W.; Asuncion, M.; Lam, J.S.; Naismith, J.H. The structural basis of the catalytic  
1004 mechanism and regulation of glucose-1-phosphate thymidyltransferase (rmla). *EMBO J*  
1005 **2000**, *19*, 6652-6663.
- 1006 154. Lakhali-Naouar, I.; Jardim A, S., R.; Luo S, K., Y.; Nakhasi, H.L.; Duncan, R.C. *Leishmania*  
1007 *donovani* argininosuccinate synthase is an active enzyme associated with parasite  
1008 pathogenesis. *PLoS Negl Trop Dis.* **2012**, *6*, e1849.
- 1009 155. Piet, J.R.; Geldhoff, M.; van Schaik, B.D.; Brouwer, M.C.; Valls Seron, M.; Jakobs, M.E.;  
1010 Schipper, K.; Pannekoek, Y.; Zwinderman, A.H.; van der Poll, T., *et al.* *Streptococcus*  
1011 *pneumoniae* arginine synthesis genes promote growth and virulence in pneumococcal  
1012 meningitis. *J Infect Dis.* **2014**, *209*, 1781-1791.

- 1013 156. Somvanshi, V.S.; Viswanathan, P.; Jacobs, J.L.; Mulks, M.H.; Sundin, G.W.; Ciche, T.A. The  
1014 type 2 secretion pseudopilin, gspj, is required for multihost pathogenicity of *Burkholderia*  
1015 *cenoecepacia* au1054. *Infect Immun.* **2010**, *78*, 4110-4121.
- 1016 157. Yang, H.L.; Kessler, D.P. Genetic analysis of the leucine region in *Escherichia coli* b-r: Gene-  
1017 enzyme assignments. *J Bacteriol* **1974**, *117*, 63-72.
- 1018 158. Singh, R.K.; Kefala, G.; Janowski, R.; Mueller-Dieckmann, C.; von Kries, J.P.; Weiss, M.S. The  
1019 high-resolution structure of leub (rv2995c) from *Mycobacterium tuberculosis*. *J Mol Biol.* **2005**,  
1020 *346*, 1-11.
- 1021 159. Pettit, F.H.; Reed, L.J. Alpha-keto acid dehydrogenase complexes. 8. Comparison of  
1022 dihydrolipoyl dehydrogenases from pyruvate and alpha-ketoglutarate dehydrogenase  
1023 complexes of *Escherichia coli*. *Proc Natl Acad Sci U S A.* **1967**, *58*, 1126-1130.
- 1024 160. Bryk, R.; Arango, N.; Maksymiuk, C.; Balakrishnan, A.; Wu, Y.T.; Wong, C.H.; Masquelin, T.;  
1025 Hipskind, P.; Lima, C.D.; Nathan, C. Lipoamide channel-binding sulfonamides selectively  
1026 inhibit mycobacterial lipoamide dehydrogenase. *Biochemistry* **2013**, *52*, 9375-9384.
- 1027 161. Krauth-Siegel, R.L.; Schöneck, R. Flavoprotein structure and mechanism. 5. Trypanothione  
1028 reductase and lipoamide dehydrogenase as targets for a structure-based drug design. *FASEB*  
1029 *J* **1995**, *9*, 1138-1146.
- 1030 162. Boitz, J.M.; Strasser, R.; Yates, P.A.; Jardim, A.; Ullman, B. Adenylosuccinate synthetase and  
1031 adenylosuccinate lyase deficiencies trigger growth and infectivity deficits in *Leishmania*  
1032 *donovani*. *J Biol Chem.* **2013**, *288*, 8977-8990.
- 1033 163. Howard, N.I.; Dias, M.V.; Peyrot, F.; Chen, L.; Schmidt, M.F.; Blundell, T.L.; Abell, C. Design  
1034 and structural analysis of aromatic inhibitors of type ii dehydroquinase from *Mycobacterium*  
1035 *tuberculosis*. *ChemMedChem* **2015**, *10*, 116-133.
- 1036 164. Cheung, V.W.; Xue, B.; Hernandez-Valladares, M.; Go, M.K.; Tung, A.; Aguda, A.H.;  
1037 Robinson, R.C.; Yew, W.S. Identification of polyketide inhibitors targeting 3-dehydroquinone  
1038 dehydratase in the shikimate pathway of *Enterococcus faecalis*. *PLoS One* **2014**, *9*, e103598.
- 1039 165. Ballester, P.J.; Mangold, M.; Howard, N.I.; Robinson, R.L.; Abell, C.; Blumberger, J.; Mitchell,  
1040 J.B. Hierarchical virtual screening for the discovery of new molecular scaffolds in  
1041 antibacterial hit identification. *J R Soc Interface* **2012**, *9*, 3196-3207.
- 1042 166. Kumar, A.; Siddiqi, M.I.; Miertus, S. New molecular scaffolds for the design of *Mycobacterium*  
1043 *tuberculosis* type ii dehydroquinase inhibitors identified using ligand and receptor based  
1044 virtual screening. *J Mol Model* **2010**, *16*, 693-712.
- 1045 167. Prazeres, V.F.; Sánchez-Sixto, C.; Castedo, L.; Lamb, H.; Hawkins, A., R.; Riboldi-Tunnicliffe,  
1046 A.; Coggins, J.R.; Laphorn, A.J.; González-Bello, C. Nanomolar competitive inhibitors of  
1047 *Mycobacterium tuberculosis* and *Streptomyces coelicolor* type ii dehydroquinase. *ChemMedChem*  
1048 **2007**, *2*, 194-207.
- 1049 168. Siggaard-Andersen, M.; Wissenbach, M.; Chuck, J.A.; Svendsen, I.; Olsen, J.G.; von Wettstein-  
1050 Knowles, P. The fabj-encoded beta-ketoacyl-[acyl carrier protein] synthase iv from *Escherichia*  
1051 *coli* is sensitive to cerulenin and specific for short-chain substrates. *Proc Natl Acad Sci U S A.*  
1052 **1994**, *91*, 11027-11031.
- 1053 169. Magnuson, K.; Carey, M.R.; Cronan, J.E.J. The putative fabJ gene of *escherichia coli* fatty acid  
1054 synthesis is the fabF gene. *J Bacteriol* **1995**, *177*, 3593-3595.

- 1055 170. Tong, L. Structure and function of biotin-dependent carboxylases. *Cell Mol Life Sci* **2013**, *70*,  
1056 863-891.
- 1057 171. Silvers, M.A.; Robertson, G.T.; Taylor, C.M.; Waldrop, G.L. Design, synthesis, and  
1058 antibacterial properties of dual-ligand inhibitors of acetyl-coa carboxylase. *J Med Chem* **2014**,  
1059 *57*, 8947-8959.
- 1060 172. Reddy, M.C.; Breda, A.; Bruning, J.B.; Sherekar, M.; Valluru, S.; Thurman, C.; Ehrenfeld, H.;  
1061 Sacchettini, J.C. Structure, activity, and inhibition of the carboxyltransferase  $\beta$ -subunit of  
1062 acetyl coenzyme a carboxylase (accD6) from *Mycobacterium tuberculosis*. *Antimicrob Agents*  
1063 *Chemother* **2014**, *58*, 6122-6132.
- 1064 173. Levert, K.L.; Waldrop, G.L. A bisubstrate analog inhibitor of the carboxyltransferase  
1065 component of acetyl-coa carboxylase. *Biochem Biophys Res Commun* **2002**, *291*, 1213-1217.
- 1066 174. Freiberg, C.; Brunner, N.A.; Schiffer, G.; Lampe, T.; Pohlmann, J.; Brands, M.; Raabe, M.;  
1067 Hübich, D.; Ziegelbauer, K. Identification and characterization of the first class of potent  
1068 bacterial acetyl-coA carboxylase inhibitors with antibacterial activity. *J Biol Chem.* **2004**, *279*,  
1069 26066-26073.
- 1070 175. Tong, L. Acetyl-coenzyme a carboxylase: Crucial metabolic enzyme and attractive target for  
1071 drug discovery. *Cell Mol Life Sci* **2005**, *62*, 1784-1803.
- 1072 176. Zhang, R.; Ou, H.Y.; Zhang, C.T. Deg: A database of essential genes. *Nucleic Acids Res* **2004**,  
1073 *32(Database issue)*, D271-272.
- 1074 177. Moule, M.G.; Hemsley, C.M.; Seet, Q.; Guerra-Assunção, J.A.; Lim, J.; Sarkar-Tyson, M.;  
1075 Clark, T.G.; Tan, P.B.; Titball, R.W.; Cuccui, J., *et al.* Genome-wide saturation mutagenesis of  
1076 *Burkholderia pseudomallei* k96243 predicts essential genes and novel targets for antimicrobial  
1077 development. *MBio* **2014**, *5*, e00926-00913.
- 1078 178. Somvanshi, V.S.; Viswanathan, P.; Jacobs, J.L.; Mulks, M.H.; Sundin, G.W.; Ciche, T.A. The  
1079 type 2 secretion pseudopilin, gspj, is required for multihost pathogenicity of *Burkholderia*  
1080 *cenoeopacia* au1054. *Infect Immun* **2010**, *78*, 4110-4121.
- 1081 179. van Waasbergen, L.G.; Kidambi, S.P.; Miller, R.V. Construction of a reca mutant of  
1082 *Burkholderia* (formerly pseudomonas), *cepacia*. *Appl Microbiol Biotechnol* **1998**, *49*, 59-65.
- 1083 180. Appleberg, R. Macrophage nutritive antimicrobial mechanisms. *J Leukocyte Biol* **2006**, *70*,  
1084 1117-1128.
- 1085 181. McKinney, J.D.; Bentrup, K.H.; Muñoz-Elias, E.J.; Miczak, A.; Chen, B.; Chan, W.T.;  
1086 Swenson, D.; Sacchettini, J.C.; Jacobs Jr., W.R.; Russell, D.G. Persistence of *Mycobacterium*  
1087 *tuberculosis* in macrophages and mice requires the glyoxylate shunt enzyme isocitrate lyase.  
1088 *Nature* **2000**, *406*, 735-738.
- 1089 182. Fang, F.C.; Libby, S.J.; Castor, M.E.; Fung, A.M. Isocitrate lyase (aceA) is required for  
1090 salmonella persistence but not for acute lethal infection in mice. *Infect. Immun.* **2005**, *73*, 2547-  
1091 2549.
- 1092 183. Liu, N.; Cummings, J.E.; England, K.; Slayden, R.A.; Tonge, P.J. Mechanism and inhibition of  
1093 the fabI enoyl-acyl reductase from *Burkholderia pseudomallei*. *J Antimicrob Chemother* **2011**, *66*,  
1094 564-573.
- 1095 184. Bokman, A.H.; Levine, H.B.; Lusby, M. Glucose catabolism in *Malleomyces pseudomallei*. *J*  
1096 *Bacteriol* **1957**, *73*, 649-654.



- 1097 185. Kouassi, Y.; Shelef, L.A. Metabolic activities of *Listeria monocytogenes* in the presence of  
1098 sodium propionate, acetate, lactate and citrate. *J Appl Bacteriol* **1996**, *81*, 147-153.
- 1099 186. Premaratne, R.J.; Lin, W.J.; Johnson, E.A. Development of an improved chemically defined  
1100 minimal medium for *Listeria monocytogenes*. *Appl Environ Microbiol.* **1991**, *57*, 3046-3048.
- 1101 187. Joseph, B.; Przybilla, K.; Stühler, C.; Schauer, K.; Slaghuis, J.; Fuchs, T.M.; Goebel, W.  
1102 Identification of *Listeria monocytogenes* genes contributing to intracellular replication by  
1103 expression profiling and mutant screening. *J Bacteriol.* **2006**, *188*, 556-568.
- 1104 188. Bordbar, A.; Lewis, N.E.; Schellenberger, J.; Palsson, B.Ø.; Jamshidi, N. Insight into human  
1105 alveolar macrophage and *M. tuberculosis* interactions via metabolic reconstructions. *Mol Syst*  
1106 *Biol* **2010**, *6*, 422.
- 1107 189. Chatterjee, S.S.; Hossain, H.; Otten, S.; Kuenne, C.; Kuchmina, K.; Machata, S.; Domann, E.;  
1108 Chakraborty, T.; Hain, T. Intracellular gene expression profile of *Listeria monocytogenes*. *Infect*  
1109 *Immun* **2006**, *74*, 1323-1338.
- 1110 190. Eisenreich, W.; Heesemann, J.; Rudel, T.; Goebel, W. Metabolic host responses to infection by  
1111 intracellular bacterial pathogens. *Front Cell Infect Microbiol* **2013**, *3*, 24.
- 1112 191. Caspi, R.; Altman, T.; Dale, J.M.; Dreher, K.; Fulcher, C.A.; Gilham, F.; Kaipa, P.; Karthikeyan,  
1113 A.S.; Kothari, A.; Krummenacker, M., *et al.* The metacyc database of metabolic pathways and  
1114 enzymes and the biocyc collection of pathway/genome databases. *Nucleic Acids Res.* **2010**,  
1115 *38(Database issue)*, D473-479.
- 1116 192. Joseph, B.; Przybilla, K.; Stühler, C.; Schauer, K.; Slaghuis, J.; Fuchs, T.M.; Goebel, W.  
1117 Identification of *Listeria monocytogenes* genes contributing to intracellular replication by  
1118 expression profiling and mutant screening. *J Bacteriol.* **2006**, 556-568.
- 1119 193. Tuanyok, A.; Tom, M.; Dunbar, J.; Woods, D.E. Genome-wide expression analysis of  
1120 *Burkholderia pseudomallei* infection in a hamster model of acute melioidosis. *Infect Immun* **2006**,  
1121 *74*, 5465-5476.
- 1122 194. Hamad, M.A.; Austin, C.R.; Stewart, A.L.; Higgins, M.; Vázquez-Torres, A.; Voskuil, M.I.  
1123 Adaptation and antibiotic tolerance of anaerobic *Burkholderia pseudomallei*. *Antimicrob Agents*  
1124 *Chemother* **2011**, *55*, 3313-3323.
- 1125 195. Alberts, B.; Johnson, A.; Lewis, J.; Raff, M.; Roberts, K.; Walter, P. *Molecular biology of the cell*,  
1126 *4th edition*. Garland Science: New York, 2002.
- 1127 196. Myint, K.T.; Uehara, T.; Aoshima, K.; Oda, Y. Polar anionic metabolome analysis by nano-  
1128 lc/ms with a metal chelating agent. *Anal Chem* **2009**, *81*, 7766-7772.
- 1129 197. Lee, I.J.; Hom, K.; Bai, G.; Shapiro, M. Nmr metabolomic analysis of caco-2 cell differentiation.  
1130 *J Proteome Res* **2009**, *8*, 4104-4108.

1131

1132
